# SARS-CoV-2 3CLpro whole human proteome cleavage prediction and enrichment/depletion analysis

Lucas Prescott

Correspondence: [lskywalker2015@gmail.com](mailto:lskywalker2015@gmail.com)

Keywords: SARS-CoV-2, COVID-19, coronavirus, protease, proteomics, 3CLpro, machine learning, neural networks

## Abstract

A novel coronavirus (SARS-CoV-2) has devastated the globe as a pandemic that has killed more than 1,600,000 people. Widespread vaccination is still uncertain, so many scientific efforts have been directed toward discovering antiviral treatments. Many drugs are being investigated to inhibit the coronavirus main protease, 3CLpro, from cleaving its viral polyprotein, but few publications have addressed this protease's interactions with the host proteome or their probable contribution to virulence. Too few host protein cleavages have been experimentally verified to fully understand 3CLpro's global effects on relevant cellular pathways and tissues. Here, I set out to determine this protease's targets and corresponding potential drug targets. Using a neural network trained on cleavages from 388 coronavirus proteomes with a Matthews correlation coefficient of 0.983, I predict that a large proportion of the human proteome is vulnerable to 3CLpro, with 4,460 out of approximately 20,000 human proteins containing at least one putative cleavage site. These cleavages are nonrandomly distributed and are enriched in the epithelium along the respiratory tract, brain, testis, plasma, and immune tissues and depleted in olfactory and gustatory receptors despite the prevalence of anosmia and ageusia in COVID-19 patients. Affected cellular pathways include cytoskeleton/motor/cell adhesion proteins, nuclear condensation and other epigenetics, host transcription and RNAi, ribosomal stoichiometry and nascent-chain detection and degradation, coagulation, pattern recognition receptors, growth factors, lipoproteins, redox, ubiquitination, and apoptosis. This whole proteome cleavage prediction demonstrates the importance of 3CLpro in expected and nontrivial pathways affecting virulence, lead me to propose more than a dozen potential therapeutic targets against coronaviruses, and should therefore be applied to all viral proteases and subsequently experimentally verified.

## Introduction

Coronaviruses are enveloped, positive-sense, single-stranded RNA viruses with giant genomes (26-32 kb) that cause diseases in many mammals and birds. Since 2002, three human coronavirus outbreaks have occurred: severe acute respiratory syndrome (SARS) in 2002-2004, Middle East respiratory syndrome (MERS) from 2012 to present, and coronavirus disease 2019 (COVID-19) from 2019 to present. The virus that causes the latter disease, SARS-CoV-2, was first thought to directly infect the lower respiratory epithelium and cause pneumonia in susceptible individuals. The most common symptoms include fever, fatigue, nonproductive or productive cough, myalgia, anosmia, ageusia, and shortness of breath. More recently, however, correlations between atypical symptoms (chills, arthralgia, diarrhea, conjunctivitis, headache, dizziness, nausea, severe confusion, stroke, and seizure) and severity of subsequent respiratory symptoms and mortality have motivated researchers to investigate additional tissues that may be infected. One way to explain these symptoms and associated cellular pathways is to review enrichment and depletion in virus-host interaction networks, particularly those including the coronavirus proteases.

Angiotensin-converting enzyme 2 (ACE2), the main receptor for SARS-CoV-1 and -2, has been shown to be less expressed in lung than in many other tissues. Respiratory coronaviruses likely first infect the nasal epithelium and tongue[1] and then work their way down to the lung and/or up through the cribriform plate to the olfactory bulb, through the rhinencephalon, and finally to the brainstem.[2-5]

48 Additionally, based on ACE2 expression and *in vitro* and *in vivo* models, multiple parts of the  
49 gastrointestinal tract (mainly small and large intestine, duodenum, rectum, and esophagus; less  
50 appendix and stomach) and accessory organs (mainly gallbladder, pancreas, liver[6, 7], salivary gland[8];  
51 less tongue and spleen)[9], kidney,[10] male and female reproductive tissues,[11, 12] heart,[13] immune  
52 cells,[14, 15] and adipose tissue[16-18] may be infectible with corresponding symptoms and  
53 comorbidities.

54 Coronaviruses have two main open reading frames, orf1a and orf1b, separated by a ribosomal  
55 frameshift and resulting in two large polyproteins, pp1a and pp1ab, containing proteins including two  
56 cysteine proteases,[19] an RNA-dependent RNA polymerase, and other nonstructural proteins (nsp1-  
57 16). The main function of these proteases is to cleave the polyproteins into their individual proteins to  
58 form the transcription/replication complex, making them excellent targets for antiviral drug  
59 development.[20-23] The papain-like protease (PLpro) and 3 chymotrypsin-like protease (3CLpro) only  
60 have 3 and 11 cleavage sites, respectively, in the polyproteins, but it is reasonable to assume that both  
61 proteases may cleave host cell proteins to modulate the innate immune response and enhance virulence  
62 as in picornaviruses and retroviruses, such as human immunodeficiency virus (HIV).

63 PLpro is a highly conserved protein domain that has been shown to determine virulence of  
64 coronaviruses[24] and possess deubiquitinating and deISGylating activity including cleaving interferon-  
65 stimulated gene 15 (ISG15) induced by interferon via the Janus kinases and signal transducer and  
66 activator of transcription proteins (JAK-STAT) pathway from ubiquitin-conjugating enzymes and  
67 potentially from downstream effectors.[25-29] PLpro deubiquitination also prevents activating  
68 phosphorylation of interferon regulatory factor 3 (IRF3) and subsequent type-I interferon  
69 production,[30, 31] however the ubiquitinated leucine in human IRF3 is replaced by a serine in bats  
70 likely including *Rhinolophus affinis* (intermediate horseshoe bat), the probable species of origin of SARS-  
71 CoV-2.[32, 33]

72 3CLpro is also highly conserved among coronaviruses; SARS-CoV-2 3CLpro is 96.08% and 50.65%  
73 identical, respectively, to the SARS- and MERS-CoV homologs, the former with only 12 out of 306 amino  
74 acids substituted with all 12 outside the catalytic dyad or surrounding pockets.[34-36] Even the most  
75 distant porcine deltacoronavirus HKU15 3CLpro shares only 34.97% identity yet is similarly conserved in  
76 the these important residues. This conservation indicates that all these proteases are capable of cleaving  
77 similar sequences no matter the protease genus of origin. In addition to the 11 sites in the polyproteins,  
78 these proteases are known to cleave host proteins including STAT2[37], NF-kappa-B essential modulator  
79 (NEMO)[38], the nucleotide-binding oligomerization domain (NOD)-like receptor NLRP12, and TGF-beta  
80 activated kinase 1 (TAB1)[39] to modulate interferon signaling. Similar proteases have been studied in  
81 the other members of *Nidovirales*[40] and the related *Picornavirales*[41-45], with foot-and-mouth  
82 disease virus (FMDV) 3Cpro cleaving histone H3,[46, 47] poliovirus 3Cpro cleaving TFIID and TFIIC,[48-  
83 52] and polio- and rhinovirus but not cardiovirus 3Cpro cleaving microtubule-associated protein 4  
84 (MAP4).[53, 54] These results, however, have not been reproduced for SARS-CoV-2 yet, and STAT2,  
85 NEMO, NLRP12, TAB1, H3, TFIIC, TFIID, and MAP4 are only a few of many cleaved proteins.

86 The high number of 3CLpro cleavages in coronavirus polyproteins has, however, allowed for  
87 sequence logos and resulting sequence rules and training of decision trees and neural networks (NN) for  
88 additional cleavage site prediction.[55-60] Notably, Kiemer et al.'s NN[59] based on Blom et al.'s  
89 equivalent picornaviral NN[60] was trained on 7 arbitrary coronavirus genomes, totaling 77 cleavages,  
90 and had a Matthews correlation coefficient (MCC) of 0.84, much higher than the traditional consensus  
91 pattern's 0.37 for the same training set size. They predicted cleavage sites in select host proteins,  
92 namely the transcription factors CREB-RP, OCT-1, and multiple subunits of TFIID, the innate immune  
93 modulators interferon alpha-induced protein 6 (IFI6) and IL-1 receptor-associated kinase 1 (IRAK-1), the  
94 epithelial ion channels cystic fibrosis transmembrane conductance regulator (CFTR) and amiloride-  
95 sensitive sodium channel subunit delta (SCNN1D), the tumor suppressors p53-binding proteins 1 and 2

96 (although not p53 itself), RNA polymerase I and III subunits (RPA1 and RPC1), eukaryotic translation  
97 initiation factor 4 gamma 1 (eIF4G1), the cytoskeletal proteins MAP4 and microtubule-associated  
98 protein RP/EB members 1 and 3 (MAPRE1/3), and many members of the ubiquitin pathway (ubiquitin  
99 hydrolases USP1/4/5/9X/9Y/13/26 and suppressor of cytokine signaling 6 (SOCS6)).

100 Additionally, Yang's decision trees[58] were trained on 4 amino acid sliding windows and  
101 substitution matrix similarity score-based embeddings, achieved MCCs up to 0.95, but were limited to  
102 only 18 coronavirus polyproteins. The embedding-derived non-orthogonality somewhat stabilized the  
103 prediction to small changes in sequence assuming the substitution matrix reflects how the cleavages  
104 evolve. Decision trees have the benefit of being symbolic and explainable but often predict suboptimally  
105 when presented with interpolated or extrapolated inputs, making alternative machine learning  
106 techniques more attractive for predicting human protein cleavage prediction. For example, Narayanan  
107 et al.[61] and later Singh et al.[62] demonstrated that neural networks outperform decision trees for HIV  
108 and hepatitis C virus (HCV) protease cleavage prediction. Additional mixed methods such as Li et al.'s  
109 nonlinear dimensionality reduction and subsequent support vector machine (SVM) are able to retain  
110 some of the benefits of both linear and nonlinear classifiers.[63] Rognvaldsson et al.[64, 65] argue that  
111 nonlinear models including neural networks should not be used for cleavage prediction, however the  
112 HIV dataset from Cai et al.[66] that they used and their expanded dataset only included 299 and 746  
113 samples, respectively. Additionally, physiochemical or structural encodings have outperformed one-hot  
114 encoding (also called orthogonal encoding) for their small HIV datasets[67] and have moreover  
115 eliminated differences between linear and nonlinear classifiers in an equivalent HCV dataset with 891  
116 samples.[68] To my knowledge no one has expanded the 3CLpro cleavage dataset to the point where  
117 nonlinearity becomes significant, investigated the entire human proteome for 3CLpro cleavages sites  
118 with any method, or performed enrichment analysis and classification of these affected proteins.

## 119 120 **Methods**

### 121 **Data Set Preparation**

122 A complete, manually reviewed human proteome containing 20,350 sequences (not including  
123 alternative isoforms) was retrieved from UniProt/Swiss-Prot (proteome:up000005640 AND  
124 reviewed:yes).[69]

125 Additional coronavirus polyprotein cleavages were collected from GenBank.[70] Searching for  
126 "orf1ab," "pp1ab," and "1ab" within the family *Coronaviridae* returned 388 different, complete  
127 polyproteins with 762 different cleavages manually discovered using the Clustal Omega multiple  
128 sequence alignment server.[71-73] All 4,268 balanced positive cleavages were used for subsequent  
129 classifier training in addition to all other uncleaved coronavirus sequence windows centered at  
130 glutamines (17,493) and histidines (11,421), totaling 33,182 samples.

### 131 **Cleavage Prediction**

132 The NetCorona 1.0 server as in Kiemer et al.'s work[59], my reproductions of their sequence  
133 logo-derived rules and NN, and my improved sequence logo-based logistic regression and naïve Bayes  
134 classification and NNs were used for prediction of cleavage sites.[74] Some predicted cleavage sites  
135 were close enough to the N- and C-termini that the nine amino acid window input into the neural  
136 network was not filled. These sites with center glutamine residue less than four amino acids from the N-  
137 terminus or less than five amino acids from the C-terminus were omitted because although they may be  
138 within important localization sequences, their cleavage kinetics are likely significantly retarded by  
139 truncation.

### 140 **Enrichment Analysis**

141 Protein annotation, classification, and enrichment analysis was performed using the Database  
142 for Annotation, Visualization, and Integrated Discovery (DAVID) 6.8.[75, 76] My training data, prediction  
143 methods, and results can be found on GitHub (<https://github.com/Luke8472NN/NetProtease>).

144 **Results**

145 Here I assumed that SARS-CoV-2 3CLpro is capable of cleaving all aligned cleavages between the  
 146 four genera of coronaviruses (*Alpha-*, *Beta-*, *Gamma-*, and *Delta-*) because variation in cleavage  
 147 sequences is greater within polyproteins than between them (Figure 1) no matter the existence of  
 148 protease/cleavage cophylogeny (Figure 2).[77]  
 149

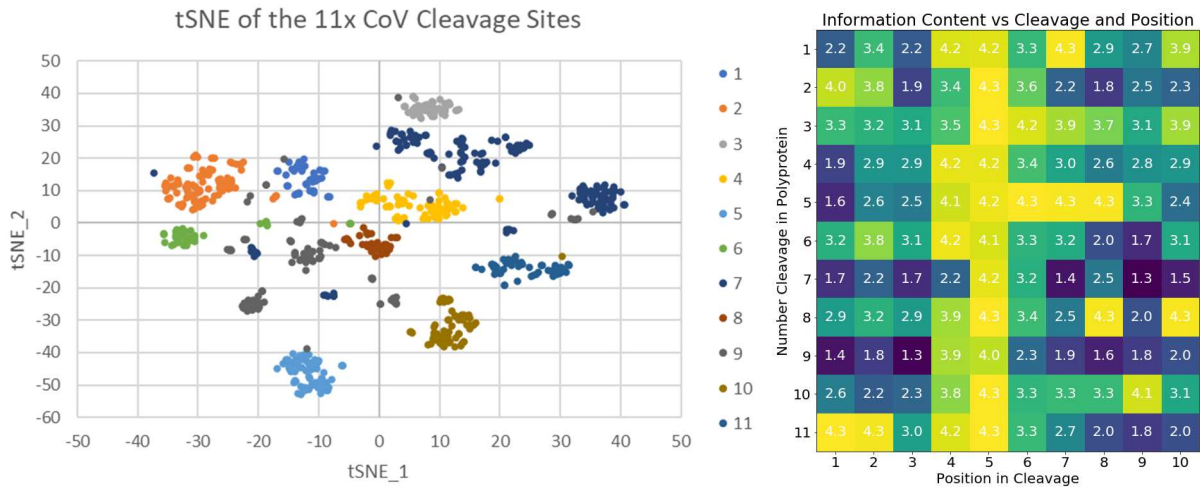

150 Figure 1: One-hot encoded t-distributed stochastic neighbor embedding (t-SNE)[78] and information  
 151 content both demonstrate that cleavage variation within genomes is more important than variation  
 152 between genomes.  
 153

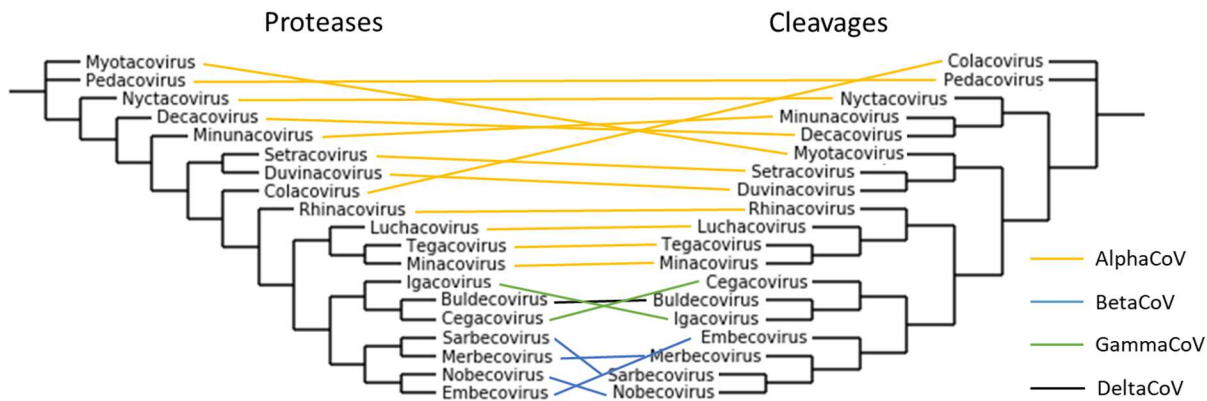

154 Figure 2: Unscaled subgenera-averaged tanglegram of 3CLpro and respective cleavages based on  
 155 BLOSUM62 substitution matrix similarity scores with and without default affine gap penalties (opening  
 156 10 and extension 0.2).  
 157  
 158

159 Kiemer et al.'s seven genome sequence logo and multilayer perceptron structure with each  
 160 amino acid one-hot encoded as a binary vector of length 20 (an input of 200 bits i.e. linearized 10 amino  
 161 acids surrounding the cleavage) were both reproduced.[59] First, logistic regression was performed on  
 162 the logit of the probability output of the sequence logo (as opposed to Chou et al.'s manual probability  
 163 cutoff setting by maximizing an unbalanced measure of accuracy[79]) with a nonzero but optimally  
 164 extremely small pseudocount and returned an MCC of 0.825 with 74.0% recall. Updating the sequence  
 165 logo with all known cleavages improved its MCC to 0.936 with 94.8% recall (Figure 3). A naïve Bayes  
 166 classifier was additionally constructed from both the positive and negative sequence logos and slightly  
 167 improved the MCC to 0.947 with 95.7% recall. Figure 4 demonstrates correlations (represented as the

168 mutual information variant known as total entropy correlation coefficients or symmetric uncertainties)  
 169 between positions that are not captured by simple sequence logos and classifiers assuming  
 170 independence.[80, 81] NNs, however, allow inclusion of 2D and higher-order correlations not easily  
 171 visualizable and therefore often improve accuracy. Finally, in addition to information content, Figure 5  
 172 shows a charge-polarity-hydrophobicity scale with a lack of obvious trend or conservation reaffirming  
 173 that one-hot encoding performs better than any physiochemical, lower-dimensional inputs when the  
 174 training set is large enough.

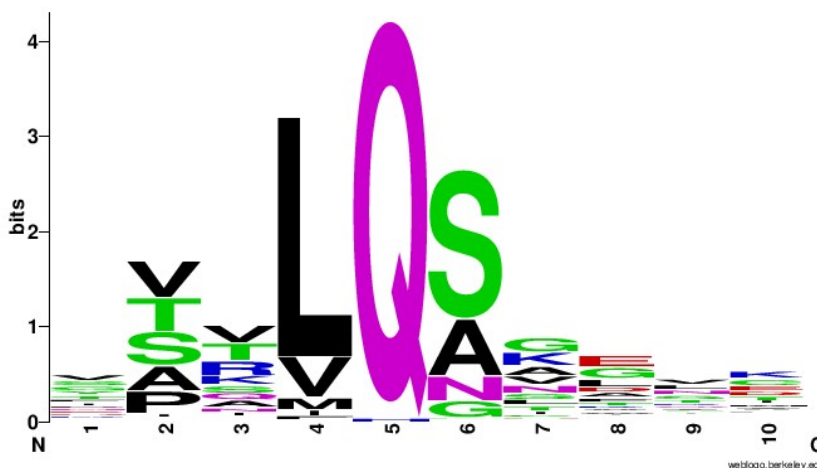

175  
176

Figure 3: Improved 3CLpro cleavage site sequence logo plotted by WebLogo v2.8.2.[82]

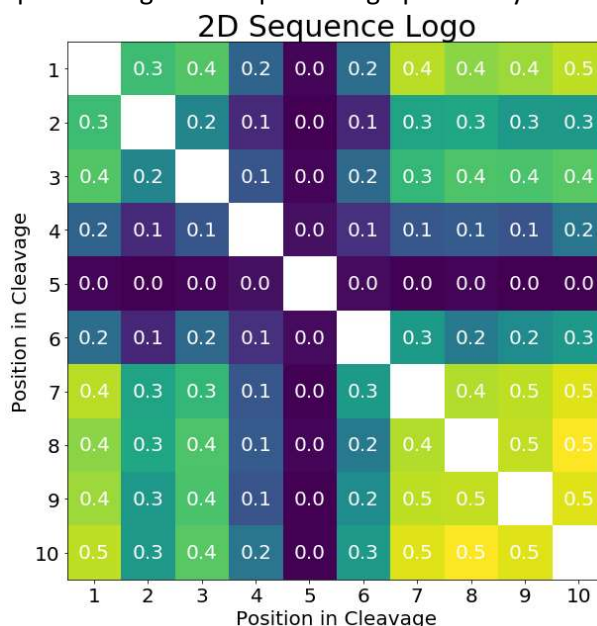

177  
178  
179

Figure 4: Entropy correlation coefficients (also known as symmetric uncertainties) between positions within the improved sequence logo.



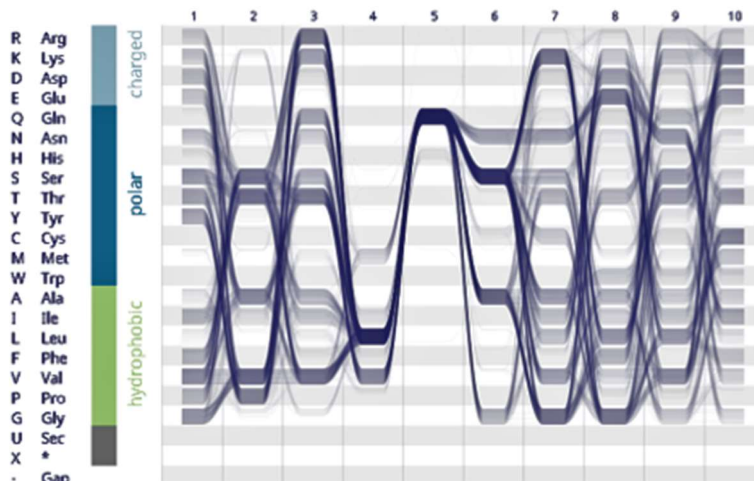

Figure 5: Sequence bundle with charge-polarity-hydrophobicity encoding.[83]

180  
181  
182  
183 As for my improvements to the NN, note that Kiemer et al.'s MCC of 0.840 is an average from  
184 triple cross-validation (CV).[59] Because the known cleavage dataset is small, no data went unused; the  
185 three NN output scores were averaged and similarly considered cleavages when greater than 0.5.  
186 Applying this average scoring to the entire small and large dataset resulted in single MCCs of 0.946 and  
187 0.849. Retraining the same NN structures (each with one hidden layer with 2 neurons) on the larger  
188 dataset resulted in three-average CV and single final MCCs of 0.979 and 0.996, a significant  
189 improvement even though the datasets are less balanced. Adding all other histidines (which precede  
190 19/762 different cleavages) as negatives again improved the CV MCC to 0.994 and slightly reduced the  
191 final MCC to 0.992. Interestingly, two infectious bronchitis virus (IBV) polyproteins contained cleavages  
192 following leucine, methionine, and arginine (VSKLL^AGFKK in APY26744.1 and LVDYM^AGFKK and  
193 DAALR^NNEML in ADV71773.1). To my knowledge, synthetic tetra/octapeptides have been cleaved  
194 following histidine, phenylalanine, tryptophan, methionine, and possibly proline residues,[56, 84] but  
195 only one natural histidine substitution has been documented in HCoV-HKU1[85] and likely does not  
196 affect function.[86-88] To optimize hyperparameters, the whole dataset was repeatedly split into 80%  
197 training/20% testing sets with further splitting of the 80% training set for cross validation. The optimal  
198 settings, naive oversampling (within training folds[89]), averaged three-fold cross-validation (on the  
199 whole dataset, not just the initial 80%), limited-memory Broyden-Fletcher-Goldfarb-Shanno (lbfgs)  
200 solver, hyperbolic tangent activation, 0.00001 regularization, and 1 hidden layer with 10 neurons, had a  
201 20% test set MCC average and standard deviation of 0.983+/-0.003 when split and trained many times.  
202 Train/test sets repeatedly split with different ratios in Figure 6 demonstrate that the entire dataset is  
203 not required for acceptable performance for all three classification methods, although the optimal and  
204 my finally method used three networks on all the data (with three-fold cross-validation), returning a  
205 three-average CV and final MCC of 0.983 and 0.998, respectively. Note that Figure 6 displays a curve for  
206 an equivalent physiochemical encoding (with input side 40 containing normalized volumes, interface  
207 and octanol hydrophobicity scales, and isoelectric points) underperforming when compared to one-hot  
208 encoding even at relatively small training sizes. Of these four physiochemical scales, octanol  
209 hydrophobicity alone reached a test MCC of 0.959, and, in the order of importance, addition of volume,  
210 interface hydrophobicity, and isoelectric point features increased the maximum test MCC to 0.977.  
211 Table 1 finally lists the one-hot encoded NN's few incorrectly labeled sequences and their respective  
212 sources and scores.  
213

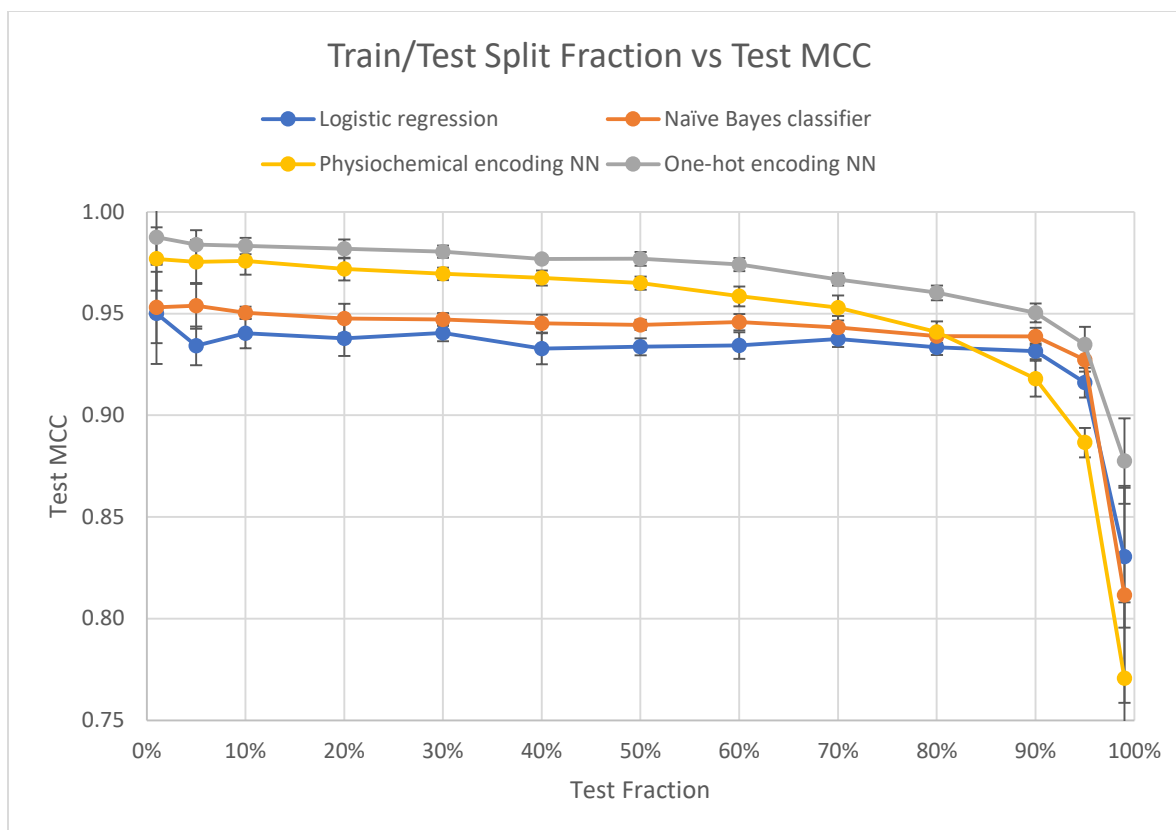

214  
215 Figure 6: Train/test split fraction vs MCC demonstrating that performance quickly approaches a limit for  
216 all classifiers.  
217

218 Table 1: Only 15 out of 33,182 sequences were incorrectly labeled by the final NN. FN, false negative; FP,  
219 false positive.

| Error | Genera       | Virus                                         | Taxonomy ID      | Sequence    | Score   |
|-------|--------------|-----------------------------------------------|------------------|-------------|---------|
| FN    | Gamma        | Beluga whale CoV SW1                          | NCBI:txid694015  | SLELQSVQPN  | 0.00000 |
| FN    | Unclassified | Shrew CoV                                     | NCBI:txid2050019 | SYQIQGKDES  | 0.33024 |
| FN    | Unclassified | Shrew CoV                                     | NCBI:txid2050019 | YPTLQGQWAP  | 0.33170 |
| FN    | Alpha        | Wencheng Sm shrew CoV                         | NCBI:txid1508228 | NNNLQVLRL   | 0.33329 |
| FN    | Unclassified | Guangdong Chinese water skink CoV             | NCBI:txid2116470 | GVKVQSFVKV  | 0.37234 |
| FN    | Gamma        | Canada goose CoV                              | NCBI:txid2569586 | RPTMQFDSYS  | 0.38064 |
| FN    | Beta         | SARS                                          | NCBI:txid694009  | VAVLQAENVT  | 0.42198 |
| FP    | Beta         | CoV BtRI-BetaCoV/SC2018                       | NCBI:txid2591233 | FVRIQSGQTF  | 0.53847 |
| FP    | Alpha        | Myotis ricketti CoV SAX2011                   | NCBI:txid1503289 | NKTLHAGILD  | 0.66122 |
| FP    | Beta         | HCoV-OC43                                     | NCBI:txid31631   | PAALHSKCLT  | 0.66138 |
| FP    | Beta         | MERS                                          | NCBI:txid1335626 | VIIILQATKFT | 0.66151 |
| FP    | Alpha        | Feline CoV                                    | NCBI:txid12663   | ETSLQCLIST  | 0.66504 |
| FP    | Alpha        | Unclassified Minacovirus<br>Mink/China/1/2016 | NCBI:txid2163884 | KTKIQAKFGT  | 0.66668 |
| FP    | Beta         | MERS                                          | NCBI:txid1335626 | FVVVLQGVST  | 0.71328 |
| FP    | Alpha        | NL63-related bat CoV                          | NCBI:txid2501929 | NSILQGTSL   | 0.99993 |

220  
221 Of the 20,350 manually reviewed human proteins, 4,460 were cleaved at least once with a NN  
222 score greater than or equal to 0.5. To prove that the 5,887 cleavages were nonrandomly distributed  
223 among human proteins (with a maximum of 25 cleavages in the 5,795 amino acid, RNA splicing  
224 regulation nucleoprotein protein AHNAK2), random sequences with weighted amino acid frequencies

225 were checked for cleavages. Cleavages occurred at 1.10% of glutamines (4.77% of amino acids)[90] or  
226 every 1,900 amino acids in these random sequences. Most proteins are shorter than this and would, if  
227 randomly distributed, follow a Poisson distribution; my data's deviation from this distribution indicates  
228 that many cleavages are intentional.

229 Tissue (UP\_TISSUE and UNIGENE\_EST\_QUARTILE), InterPro, direct Gene Ontology (GO includes  
230 cellular compartment (CC), biological process (BP), and molecular function (MF)), Reactome pathways,  
231 sequence features, and keywords annotations were all explored in DAVID.[75, 76] Only annotations with  
232 Benjamini-Hochberg-corrected p-values less than 0.05 were considered statistically significant, and both  
233 enriched and depleted (no cleavages) annotations are listed in Tables S1-S9.

234

## 235 Discussion

236 Enrichment and depletion analyses are often used to probe the importance of annotations in  
237 many disease states, yet quantification is not possible without experimentation. First, if a protein is  
238 central to a pathway, a single cleavage may be all that is required to generate equivalent downstream  
239 outcomes. Cleaved proproteins such as coagulation factors or complement proteins may even be  
240 activated by 3CLpro cleavage. Additional exhaustive analysis or inclusion of some measure of centrality  
241 is required to determine if any insignificantly enriched or depleted pathways are still affected at central  
242 nodes (i.e. false negatives). Second, protease-, [56] substrate sequence-, [77, 84, 91-93] substrate  
243 truncation-, [94] pH-, temperature-, inhibitor type and concentration-, and time after infection-  
244 dependent cleavage kinetics convert this classification problem into a regression problem. Cleavage  
245 rates among the 11 cleavages per pp1ab vary by at least 50-fold, so predictions here assume that 3CLpro  
246 exists in high enough concentrations and for a long enough time that rate constants do not matter  
247 because cleavage reactions are complete. Third, longer proteins are more likely to be randomly cleaved  
248 and may confound conclusions about annotations containing them. Cleavages in longer proteins (e.g.  
249 cytoskeletal or cell-cell adhesion components) are no less important than those in shorter sequences,  
250 and annotations containing proteins with multiple cleavages deviating from Poisson distributions are  
251 more likely due to highly conserved sequences than simply protein length. Lastly, convergent evolution  
252 within the host may also result in false positives and may be partially avoided by investigating  
253 correlations between domains, motifs, repeats, compositionally biased regions, or other sequence or  
254 structural similarities and other functional and ontological annotations. Ideally, a negative control  
255 proteome from an uninfected species could prevent false positives, but coronaviruses are extremely  
256 zoonotic. Here, depletions in the human proteome are taken to be negative controls. Comparison with a  
257 bat proteome with deficiencies in many immune pathways, however, may show which human cleavages  
258 are unintentional or exerted little or no selective pressure before cross-species transmission.

## 259 Tissues

260 As expected in this data, the most significant tissue enrichment of 3CLpro cleavages are in the  
261 epithelium, but central and peripheral nervous tissues are also affected due to their similar expression  
262 and enrichment of complex structural and cell junction proteins. It is noteworthy that major proteins  
263 associated with neurodegenerative disease are also predicted to be cleaved: Alzheimer's disease  
264 (amyloid precursor protein (APP), tau protein), Parkinson's disease (vacuolar protein sorting-associated  
265 VPS35, eukaryotic translation initiation factor EIF4G1, DNAJ homolog DNAJC13), Huntington's disease  
266 (huntingtin), amyotrophic lateral sclerosis (trans-activation response element (TAR) DNA-binding  
267 TARDBP), and spinocerebellar ataxia type 1 (ataxin-1). Testis has somewhat similar expression to  
268 epithelium and brain, highly expresses ACE2, and is enriched in movement/motility- (subset of structural  
269 proteins) and meiosis-related (chromosome segregation) proteins, further increasing the likelihood that  
270 this tissue is infectible. Spleen, however, does not express much ACE2, and its enrichment is likely due to  
271 genes with immune function and mutagenesis sites. Proteins with greater tissue specificity (3<sup>rd</sup> quartile)  
272 show additional enrichments along the respiratory tract (tongue, pharynx, larynx, and trachea), in



273 immune tissues (lymph node and thymus), and in other sensory tissues (eye and ear). Combining tissues,  
274 tobacco use disorder is the only significantly enriched disease, but acquired immunodeficiency  
275 syndrome (AIDS) and atherosclerosis were surprisingly depleted.

276 Cleavages are also surprisingly depleted in olfactory and gustatory pathways given the virus'  
277 ability to infect related cells and present as anosmia and ageusia. Olfactory receptors are  
278 transmembrane rhodopsin-like G protein-coupled receptors that, when bound to an odorant, stimulate  
279 production of cyclic adenosine monophosphate (cAMP) via the G protein and adenylate cyclase. The G  
280 proteins GNAL and GNAS are not cleaved, and some but not all adenylate cyclases are cleaved, likely  
281 resulting in an increase in cAMP. cAMP is mainly used in these cells to open their respective ligand-gated  
282 ion channels and cause depolarization, but it is also known to inhibit inflammatory responses through  
283 protein kinase A (PKA) and exchange factor directly activated by cAMP (EPAC). Multiple  
284 phosphodiesterases (PDEs) that degrade cAMP but not PDE4, the major PDE in inflammatory and  
285 immune cells, are cleaved. PDE4 inhibitors have been shown to reduce destructive respiratory syncytial  
286 virus-induced inflammation in lung,[95] but olfactory receptor neurons are quickly regenerated and  
287 sacrifice themselves when infected by influenza A virus.[96] The depletion in cleavages and resulting  
288 increase in cAMP in these neurons is likely to inhibit their programmed cell death long enough for the  
289 virus to be transmitted through the glomeruli to mitral cells and the rest of the olfactory bulb. Tongue  
290 infection may have similar mechanisms, and herpes simplex virus has been shown to be transmitted to  
291 the brainstem through the facial and trigeminal nerves.[97]

#### 292 **Gene Ontology**

293 Cleaved proteins are depleted in the extracellular space (except for structural collagen, laminin,  
294 and fibronectin mainly associated) and enriched in the cytoplasm and many of its components,  
295 indicating that the selective pressure for cleavage is weaker once cells are lysed and the protease is  
296 released. In the cytoplasm, the most obviously enriched sets are in the cytoskeleton (microfilament,  
297 intermediate filament, microtubule, and spectrin), motor proteins (myosin, kinesin, and dynein), cell  
298 adhesion molecules (integrin, immunoglobulin, cadherin, and selectin), and relevant Ras GTPases (Rho,  
299 Rab, Ran, Rac, and Arf), particularly in microtubule organizing centers (MTOCs) including centrosomes,  
300 an organelle central to pathways in the cell cycle including sister chromatid segregation. More  
301 specifically, cleavage of the cilia-associated proteins nephrocystins 1/2/4/5/6 (NPHP1/2/4/5/6), Bardet-  
302 Biedl syndromes proteins 1/9/12 (BBS1/9/12), Alstrom syndrome 1 (ALMS1), coiled-coil and C2 domain-  
303 containing protein 2A (CC2D2A), retinitis pigmentosa 1 (RP1), protein fantom (RPGRIP1), tubby-related  
304 protein 1 (TULP1), polycystin 1/2, protein kintoun (DNAAF2), dynein axonemal heavy chain 5/11  
305 (DNAH5/11) and intermediate chain 2 (DNAI2), radial spoke head protein 6 homolog A (RSPH6A), and  
306 leucine-rich repeat-containing protein 50 (LRRC50) may contribute to dyskinesia and reduced  
307 mucociliary escalator effectiveness associated with many respiratory viruses including HCoV-229E and  
308 SARS and their resulting bacterial pneumonias.[98, 99] Additionally, ciliary dysfunction in olfactory cells in  
309 COVID-19 leads to anosmia, although the main reported mechanism is nsp13 (helicase/triphosphatase)-  
310 centrosome interaction.[100] Coiled coils account for many of these cleavages and are primarily  
311 expressed in corresponding cellular compartments in the epithelium, testis, and brain. Only the  
312 coronavirus nsp1, nsp13, and spike proteins have so far been shown to interact with the  
313 cytoskeleton,[101-103] although many other viruses including influenza A virus,[104] herpes simplex  
314 virus, rabies virus, vesicular stomatitis virus, and adeno-associated virus[105] also modulate the  
315 cytoskeleton.[106] In neurons, this allows for axonal and trans-synaptic transport of viruses which can  
316 often be inhibited but sometimes exaggerated by cytoskeletal drugs often used in oncology.[107-110]

317 Modulation of these structural and motor proteins is required for formation of the double-  
318 membrane vesicles surrounding replicase complexes[111, 112] and for egress. Similarly required for  
319 vesicular transport, the coatomer COPI, clathrin, and caveolae pathways are untouched by 3CLpro other  
320 than the muscle-specific cavin-3, but COPII's SEC24A/24B/31A are likely cleaved due to their function in

321 selecting cargo[113, 114] and contribution to membrane curvature preventing inward nucleocapsid  
322 engulfment.[115] Cleavage of retromer component VSP35, ADP-ribosylation factor-binding protein  
323 GGA1, and many adaptor protein complexes (AP1B1/G1/G2, AP2A1/B1, AP3B1/B2/D1/M1/M2, and  
324 AP5B1/M1) often targeting degradation leaves only the poorly characterized AP4 or other unknown  
325 pathways to handle egress. Modulators of any of these vesicle trafficking pathways may be effective  
326 treatments for COVID-19.

327 The nucleus is enriched because its nuclear localization signals and scaffolding proteins are  
328 cleaved. Additionally, many nuclear pore complex proteins and importins/exportins associated with RNA  
329 transport are also cleaved. Lamins, which are cleaved by caspases during apoptosis to allow  
330 chromosome detachment and condensation, are also cleaved by 3CLpro. Chromatin-remodeling  
331 proteins including histone acetyltransferases (HATs) often containing bromodomains, histone  
332 deacetylases (HDACs), structural maintenance of chromosomes (SMC) proteins (cohesins and  
333 condensins) also containing coiled coils, separase (the cysteine protease that cleaves cohesin to  
334 separate sister chromatids), and topoisomerase III alpha, but not CCCTC-binding factor (CTCF) nor any  
335 other topoisomerases are cleaved, complicating the effects on chromosome condensation and global  
336 gene expression. HDAC inhibitors have been shown to decrease or increase virulence depending on the  
337 virus,[116-120] and some but not all DNA methyltransferases and demethylases are cleaved, further  
338 complicating these effects. Viruses benefit from preventing programmed cell death and its  
339 corresponding chromosomal compaction in response to viral infection (pyknosis), but they also attempt  
340 to reduce host transcription by condensing chromosomes and reroute translation machinery toward  
341 their own open reading frames.[121, 122] Relatedly, 28S rRNA has been shown to be cleaved by murine  
342 coronavirus, and ribosomes with altered activity are likely directed from host to viral RNAs.[123]  
343 Ribosome cleavages are depleted here because they are required for viral translation, but the few  
344 ribosomal proteins that are cleaved (RPL4/10 and RPS3A/19) tend to be more represented in  
345 monosomes, not polysomes,[124] indicating that ribosomes that initiate faster than they elongate are  
346 preferred because they likely frameshift more frequently, allowing for control of the stoichiometric ratio  
347 of pp1a and pp1ab.[125] If slower ribosomes are not directly more likely to frameshift, they are still less  
348 likely to participate if frameshift-induced traffic jams, collision-stimulated translation abortion and  
349 splitting,[126] and subsequent 60S subunit obstruction sensing and nascent-chain ubiquitylation, which  
350 is especially noteworthy because zinc finger 598 (ZNF598), nuclear export mediator factor (NEMF), and  
351 listerin E3 ubiquitin ligase 1 (LTN1) are predicted to be cleaved.[127] Signal recognition particle (SRP)  
352 subunits 54/68/72kDa associated with the ribosome are also predicted to be cleaved. SRP, especially the  
353 uncleaved SRP9/14kDa heterodimer, encourage translation elongation arrest to allow translocation  
354 including transmembrane domain insertion (e.g. coronavirus envelope protein) and has been associated  
355 with frameshifts.[128-130] In fact, frameshifting is a highly enriched keyword in cleaved proteins mainly  
356 due to endogenous retroviral (ERV) elements, some of which can activate an antiviral response via  
357 pattern recognition receptors (PRRs).[131] Some also resemble reverse transcriptases and may, like the  
358 CRISPR system in prokaryotes, be capable of copying coronavirus genomic RNA to produce an RNAi  
359 response via the similarly cleaved DICER1, AGO1/2, and PIWL1/3.[132] If the latter is true, individuals  
360 with distinct ERV alleles and loci may differentially respond to SARS-CoV-2 infection and/or treatment,  
361 especially exogenous RNAi. Lastly, ribosomal proteins are also included in the nonsense-mediated decay  
362 (NMD) pathway, which is likely depleted in cleavages because NMD has been shown to be a host  
363 defense against coronavirus genomic and subgenomic RNAs' multiple ORFs and large 3' UTRs.[133] It  
364 was also shown that the nucleocapsid protein inhibits this degradation but often cannot protect newly  
365 synthesized RNAs early in infection. The selective pressure on 3CLpro may be reversed by this  
366 nucleocapsid inhibition and the preferential degradation of host mRNAs such that host resources can  
367 again be directed toward viral translation.

368 In addition to affecting large organelles, 3CLpro is predicted to cleave all known components of  
369 vault: major vault proteins (MVP), telomerase protein component 1 (TEP1), and poly(ADP-ribose)  
370 polymerase 4 (PARP4). Vault function has not been completely described, but it has known interactions  
371 with other viruses.[134-136] Telomerase reverse transcriptase (TERT) is also cleaved, but is more  
372 frequently reported to be activated by other viral infections and/or promote oncogenesis.[137]  
373 Other common viral process proteins are enriched in the epithelium and adaptive immune cells,  
374 and those cleaved may affect the heat shock response and other small RNA processing. Lactoferrin, an  
375 antiviral protein that is upregulated in SARS infection,[138] is also cleaved, although one of its  
376 fragments, lactoferricin, has known antiviral activity.[139] Cleaved PRRs include the toll-like receptors  
377 TLR6/8; the C-type lectin receptors CLEC4G/H1/4K/4L/10A/13B/13C/16A; NK cell lectin-like receptors  
378 (KLRC4/G1), aspartate/glutamate carrier 1 (ACG1), collectin-7/12, neurocan core protein, FRAS1-related  
379 extracellular matrix protein 1 (FREM1), layilin, polycystin 1, E-selectin, and thrombomodulin primarily  
380 present on dendritic cells; and the NOD-like receptors NOD2 and NLRP1/2/3/6/10/12/14. Cleaved  
381 proteins downstream of these PRRs include receptor-interacting serine-threonine-protein kinase 1/2  
382 (RIP1/2), NF-kappa-B p100 subunit, CASP8 and FADD-like apoptosis regulator (CFLAR), TIR-domain-  
383 containing adapter-inducing interferon-beta (TRIF), IRF2, and death domain-associated protein 6 (DAXX),  
384 and other relevant downstream pathways similarly include many cleaved proteins: phosphoinositide 3-  
385 kinase/protein kinase B (PI3K/AKT) pathway (PIK3CG/D, PIK3R2/5/6, serine/threonine-protein  
386 phosphatase 2A (PPP2R1A/2A/2B/2C/2D/3B/5B))(PP2A dephosphorylates AKT), neuronal and inducible  
387 nitric oxide synthase (n/iNOS)(where nitric oxide has conflicting effects on viral infections[140, 141]),  
388 tuberous sclerosis 1/2 (TSC1/2)); mechanistic target of rapamycin (mTOR) pathway (ribosomal S6 kinase  
389 1/2, sterol regulatory element-binding protein 1 (SREBP1), RB1-inducible coiled-coil protein 1 (RBCC1),  
390 regulatory-associated protein of mTOR (RAPTOR), rapamycin-insensitive companion of mTOR (RICTOR),  
391 proline-rich 5-like (PRR5L), CAP-Gly domain containing linker protein 1 (CLIP1), forkhead box protein  
392 O1/3 (FOXO1/3)); and mitogen-activated protein kinase (MAPK) pathway (MAP4K2/4/5,  
393 MAP3K4/5/6/8/13/14, kinase suppressor of RAS 2 (KSR2), MAP2K3/4, MAPK7/13/15, dual specificity  
394 protein phosphatase 8 (DUSP8), and mouse double minute 2 homolog (MDM2)). Additional cleaved  
395 transcription factors include c-Jun, activating transcription factor 6 (ATF6), the cAMP-responsive  
396 element-binding proteins CREB3/5/BP, specificity protein 1 (SP1), octamer transcription factors OCT1/2,  
397 the heat shock factors HSF2/2BP/4/X1, RNA polymerase I initiator nucleolar transcription factor 1  
398 (UBTF), RNA polymerase II initiators TFIID and selective factor 1 (SL1) subunits (TATA-binding protein  
399 (TBP), TBP-like 2, TBP-associated factor 1C/6/172) and mediator coactivator subunits  
400 1/12L/13/15/17/22/26/28, RNA polymerase III initiators TFIIB150, TFIIC, and snRNA-activating protein  
401 complex subunit 4 (SNAPC4). No interferons are cleaved likely due to their redundancy, and no  
402 interferon receptors are cleaved. The downstream effectors STAT1/2/4; the ISGs guanylate-binding  
403 protein 1 (GBP1), interferon alpha-inducible protein 6 (IFI6), membrane spanning 4-domain A4A  
404 (MS4A4A), 2'-5'-oligoadenylate synthetase 1 (OAS1), promyelocytic leukemia protein (PML), mitoferrin-  
405 2, three prime repair exonuclease 1 (TREX1), and tripartite motif-containing protein 5 (TRIM5); and the  
406 tumor necrosis factor (TNF) ligands (TNFSF3/13/18 and ectogysplasin A) and receptor TNFRSF21 are,  
407 however, also cleaved. Finally, pro-apoptotic protein cleavages exist in the Bcl-2 family (Bcl-rambo) and  
408 in caspases (CASP2/5/12), although the anti-apoptotic Bcl-2 protein (Bcl-B) and inhibitors of apoptosis  
409 (baculoviral IAP repeat-containing proteins BIRC2/3/6) are also cleaved.

#### 410 **Other Pathways and Keywords**

411 Lipoproteins are a depleted keyword, but apolipoproteins APOA-V/B/L1/(a), cholesteryl ester  
412 transfer protein (CETP), microsomal triglyceride transfer protein (MTTP), and the lipid transfer receptors  
413 LDL-related proteins LRP2/6/12 are all predicted to be cleaved and, other than the proapoptotic  
414 APOL1,[142] are associated with chylomicrons, VLDL, and LDL as opposed to HDL, indicating that  
415 lipoproteins may contribute to the correlations between COVID-19 symptom severity, dyslipidemia, and

416 cardiovascular disease. It was recently discovered that SARS-CoV-2 spike protein binds cholesterol,  
417 allowing for association with and reduced serum concentration of HDL. These findings combined with  
418 the 3CLpro cleavages show an opportunity for HDL receptor inhibitor treatment, especially antagonists  
419 of the uncleaved scavenger receptor SR-B1.[143] Cleavage of the adipokines leptin, leptin receptor, and  
420 IL-6 provide a mechanism for COVID-19 comorbidity with obesity independent of lipoproteins and  
421 indicate another potential treatment: anti-leptin antibodies.[144, 145]

422 Ubiquitinating and deubiquitinating (DUBs) enzymes are most enriched in the epithelium and  
423 the nucleus and include cleaved ubiquitin ligase-supporting scaffolding cullins and DUBs such as the  
424 ubiquitous proteasomal subunit RPN11 and related lid subunits RPN6/10/12. Ubiquitin itself is not, but  
425 neural precursor cell expressed developmentally downregulated protein 4 (NEDD4) and the related  
426 SMAD ubiquitination regulatory factor 1/2 (SMURF1/2) and HECT, C2, and WW domain containing E3  
427 ubiquitin ligase 1 (HECW1) are, cleaved. NEDD4 has been shown to enhance influenza infectivity by  
428 inhibiting interferon-induced transmembrane protein 3 (IFITM3)[146, 147] and Japanese encephalitis  
429 virus by inhibiting autophagy,[148] but its ubiquitination of many diverse human viruses promotes their  
430 egress. IFITMs generally have antiviral activity (others include HIV-1,[149] dengue virus,[150] and  
431 filoviruses[151]), but its use as a treatment for COVID-19 should be carefully considered given its varying  
432 effects among other coronaviruses.[152, 153] SARS-CoV-2 has two probable NEDD4 binding sites: the  
433 proline-rich, N-terminal PPAY and LPSY[154] in the spike protein and nsp8, respectively. Although the  
434 former sequence is APNY and is likely not ubiquitinated in SARS-CoV, small molecule drugs targeting this  
435 interaction or related kinases may be useful treatments for COVID-19 as they have been for other RNA  
436 viruses.[155-157] Further research is required to compare these cleavages to the PLpro deubiquitinating  
437 activity and the specificity and function of distinct ubiquitin and other ubiquitin-like protein linkage  
438 sites.[158, 159]

439 Helicases make up approximately 1% of eukaryotic genes and are enriched in cleavages with  
440 many containing RNA-specific DEAD/DEAH boxes. Most viruses except for retroviruses have their own  
441 helicase (nsp13 in SARS-CoV-2) and multiple human RNA helicases have been shown to sense viral RNA  
442 or enhance viral replication.[160-162] SARS nsp13 and nsp14 have been shown to be enhanced by the  
443 uncleaved human DDX5 and DDX1, respectively.[163, 164], however multiple proteins interacting with  
444 DDX1 (FAM98A) and DDX5 (DHX15, SNW1, MTREX, and HNRNPH1), the retinoic acid-inducible gene I  
445 (RIG-I)-associating DDX6, and DDX20 involved in ribosome assembly are predicted to be cleaved, making  
446 these effects enigmatic without knowledge of additional interactions with other nsps.

447 Fibronectin type-III domains are enriched, but fibronectin itself is not cleaved. No cleaved  
448 proteins with this domain are directly related to coagulation, but the related tissue factor, coagulation  
449 factors VIII (antihemophilic factor A glycoprotein, also an acute-phase protein secreted in response to  
450 infection), XII (Hageman factor), XIII (fibrin-stabilizing factor transglutaminase), plasmin(ogen), von  
451 Willebrand factor, and kininogen-1 are cleaved. Multiple cleaved serpin suicide protease inhibitors  
452 (plasminogen activator inhibitor-2, megsin, alpha-1-antitrypsin, and the less relevant angiotensinogen,  
453 protein Z-dependent protease inhibitor, leukocyte elastase inhibitor, and heat shock protein 47) are also  
454 related to coagulation, potentially increasing both thrombosis and fibrinolysis rates or resulting in dose-  
455 dependent effects.[165, 166] Angiotensinogen is, however, unrelated to coagulation and is cleaved far  
456 from its N-terminus, so its effects on the renin-angiotensin system remain unknown. The structurally  
457 similar alpha-2-macroglobulin has a predicted cleavage outside its protease bait region, however, the  
458 addition of a missense mutation Q694S would allow cleavage at the same site as factor XIII without  
459 reducing protease trapping ability as much as large deletions.[167, 168] Additional support for this  
460 potential exogenous replacement includes presence of serine in the same position in pregnancy zone  
461 protein (PZP), which shares 71% identity with alpha-2-macroglobin and contains a neighboring GAG site  
462 resembling known PLpro cleavages in its primary bait region. Most other antiproteases, however, are  
463 too small to have many potential cleavage sites even though they are a very important response to



464 respiratory virus infection. Serpin or alpha globulin replacement therapy or treatment with modified  
465 small, 3CLpro competitive inhibitors may be a useful treatment for COVID-19.[169]

466 In addition to coagulation factors, the complement system can induce, in addition to many other  
467 components of innate immunity, expulsion of neutrophil extracellular traps (NETs) intended to bind and  
468 kill pathogens.[170] NETs, however, simultaneously trap platelets expressing tissue factor and  
469 contribute to hypercoagulability. The complement pathway is not obviously enriched, but many central  
470 proteins (C1/3/4 and factor B) are or have subunits that are cleaved, indicating viral adaptation to the  
471 classical, alternative, and likely lectin pathways.[171-173] Neutrophilia and NET-associated host damage  
472 are known to occur in severe SARS-CoV-2 infection, so inhibitors of the pathway are currently in clinical  
473 trials: histone citrullination, neutrophil elastase, and gasdermin D inhibitors to prevent release and  
474 DNases to degrade chromatin after release.[174, 175] Complement inhibition would likely similarly  
475 reduce the risks of hypercoagulability and other immune-mediated inflammation associated with  
476 COVID-19, but effects may vary widely between sexes and ages.[176, 177]

477 Redox-active centers including proteins involved in selenocysteine synthesis are additionally  
478 depleted in cleavages likely because of their involvement in avoiding cell death and innate immune  
479 response. Respiratory viruses differentially modulate redox pathways, balancing lysis-enhanced virion  
480 proliferation and dual oxidase 2 (DUOX2)-derived reactive oxygen species (ROS)-induced interferon  
481 response.[178] In addition to depleted antioxidant proteins, cleavage of DUOX1/2, NADPH oxidase 5  
482 (NOX5), and xanthine oxidase (XO), the former of which are upregulated in chronic obstructive  
483 pulmonary disease (COPD),[179] indicates that coronaviruses prefer to reduce oxidative stress in  
484 infected cells, contrary to most COVID-19 symptoms. Given the diversity of responses to respiratory  
485 virus infections, each proposed antioxidant should be thoroughly evaluated before being recommended  
486 as a treatment of COVID-19.

487 The impact of post-translational modifications on viral protease cleavage frequency remains  
488 uncharacterized. Glutamine and leucine, the two most important residues in the cleavage sequence  
489 logo, are rarely modified, but serine, the next most important residue, is the most frequently  
490 phosphorylated amino acid. Analysis of keywords showed enrichment of phosphoproteins and depletion  
491 of disulfide crosslinked, lipid-anchored, and other transmembrane proteins.

492 Lastly, the keywords polymorphism and alternate splicing were enriched, indicating that  
493 additional variability between cell lines and between individuals are likely. Once health systems are not  
494 so burdened by the quantity of cases and multiple treatments are developed, personalized interventions  
495 will likely differ significantly between individuals.

496

## 497 **Conclusion**

498 Many expected and novel protein annotations were discovered to be enriched and depleted in  
499 cleavages, indicating that 3CLpro is a much more important virulence factor than previously believed.  
500 3CLpro cleavages are enriched in the epithelium (especially along the respiratory tract), brain, testis,  
501 plasma, and immune tissues and depleted in olfactory and gustatory receptors. Affected pathways with  
502 discussed connections to viral infections include cytoskeleton/motor/cell adhesion proteins, nuclear  
503 condensation and other epigenetics, host transcription and RNAi, coagulation, pattern recognition  
504 receptors, growth factor, lipoprotein, redox, ubiquitination, apoptosis. These pathways point toward  
505 many potential therapeutic mechanisms to combat COVID-19: cytoskeletal drugs frequently used  
506 against cancer, modulators of ribosomal stoichiometry to enrich monosomes, upregulation of DICER1  
507 and AGO1/2, exogenous lactoferrin and modified antiproteases including alpha globulins, upregulation  
508 of serpins potentially via dietary antioxidants, complement inhibition, reduction of LDL and inhibition of  
509 HDL receptor (e.g. by antagonizing SR-B1), anti-leptin antibodies, and downregulating NEDD4 or related  
510 kinases and upregulating IFITMs. Pathway components with more complex disruption that may also  
511 deliver therapeutic targets but require elucidating experimental results include PDEs, histone



512 acetylation, nitric oxide, and vesicle coatomers. It is also worth further investigating how 3CLpro  
513 contributes if at all to the correlations between obesity and severity of infection or to viral induction of  
514 autoimmune and potentially oncological conditions.

515 Expansion of the training dataset to the whole order *Nidovirales* may provide more diversity to  
516 improve classifying methods if additional protease/cleavage coevolution does not invalidate the  
517 assumption of cross-reactivity. Issues requiring *in vitro* and *in vivo* experimentation include  
518 characterization of cleavage kinetics, any functional differences between proteases, the molecular  
519 effects of post-translation modifications, the individual and population effects of polymorphisms in  
520 cleavage sequences on susceptibility to or severity of infection. Even though many caveats exist without  
521 experimentation, similar prediction, enrichment/depletion analysis, and therapeutic target identification  
522 should be performed for every other viral protease.

523

#### 524 **Acknowledgments**

525 I am very grateful for my mother, Victoria Prescott, Esq., and friends who have given me  
526 invaluable help and advice throughout my work on this project.

527

#### 528 **References**

- 529 1. Lechien JR, Chiesa-Estomba CM, De Siati DR, Horoi M, Le Bon SD, Rodriguez A, et al. Olfactory and  
530 gustatory dysfunction as a clinical presentation of mild to moderate forms of COVID-19: A  
531 multicenter European study. *Eur Arch Otorhinolaryngol*. 2020 Aug;277(8):2251–61.  
532 <https://doi.org/10.1007/s00405-020-05965-1> PMID: 32253535
- 533 2. Baig AM, Khaleeq A, Ali U, Syeda H. Evidence of the COVID-19 virus targeting the CNS: Tissue  
534 distribution, host-virus interaction, and proposed neurotropic mechanisms. *ACS Chem Neurosci*.  
535 2020 Mar;11(7):995–8. <https://doi.org/10.1021/acscchemneuro.0c00122> PMID: 32167747
- 536 3. Lau KK, Yu WC, Chu CM, Lau ST, Sheng B, Yuen KY. Possible central nervous system infection by SARS  
537 coronavirus. *Emerg Infect Dis*. 2004 Feb;10(2):342–4. <https://doi.org/10.3201/eid1002.030638>  
538 PMID: 15030709
- 539 4. Netland J, Meyerholz DK, Moore S, Cassell M, Perlman S. Severe acute respiratory syndrome  
540 coronavirus infection causes neuronal death in the absence of encephalitic in mice transgenic for  
541 human ACE2. *J Virol*. 2008 Aug;82(15):7264–75. <https://doi.org/10.1128/JVI.00737-08> PMID:  
542 18495771
- 543 5. Li YC, Bai WZ, Hashikawa T. The neuroinvasive potential of SARS-CoV2 may play a role in the  
544 respiratory failure of COVID-19 patients. *J Med Virol*. 2020 Mar;2020:1–4.  
545 <https://doi.org/10.1002/jmv.25728> PMID: 32104915
- 546 6. Zhang C, Shi L, Wang FS. Liver injury in COVID-19: management and challenges. *Lancet Gastroenterol*  
547 *Hepatol*. 2020 May;5(5):428–30. [https://doi.org/10.1016/S2468-1253\(20\)30057-1](https://doi.org/10.1016/S2468-1253(20)30057-1) PMID: 32145190
- 548 7. Chau TN, Lee KC, Yao H, Tsang TY, Chow TC, Yeung YC, et al. SARS-associated viral hepatitis caused  
549 by a novel coronavirus: Report of three cases. *Hepatology*. 2004 Feb;39(2):302–10.  
550 <https://doi.org/10.1002/hep.20111> PMID: 14767982
- 551 8. Liu L, Wei Q, Alvarez X, Wang H, Du Y, Zhu H, et al. Epithelial cells lining salivary gland ducts are early  
552 target cells of severe acute respiratory syndrome coronavirus infection in the upper respiratory tract  
553 of rhesus macaques. *J Virol*. 2011 Apr;85(8):4025–30. <https://doi.org/10.1128/JVI.02292-10> PMID:  
554 21289121
- 555 9. Zhan J, Deng R, Tang J, Zhang B, Tang Y, Wang JK, et al. The spleen as a target in severe acute  
556 respiratory syndrome. *FASEB J*. 2006 Nov;20(13):2321–8. <https://doi.org/10.1096/fj.06-6324com>  
557 PMID: 17077309

- 558 10. Naicker S, Yang CW, Hwang SJ, Liu BC, Chen JH, Jha V. The novel coronavirus 2019 epidemic and  
559 kidneys. *Kidney Int.* 2020 May;97:824–8. <https://doi.org/10.1016/j.kint.2020.03.001> PMID:  
560 32204907
- 561 11. Fan C, Ding Y, Lu WL, Wang J. ACE2 expression in kidney and testes may cause kidney and testis  
562 damage after 2019-nCoV infection. medRxiv. 2020 Feb.  
563 <https://doi.org/10.1101/2020.02.12.20022418>
- 564 12. Chen H, Guo J, Wang C, Luo F, Yu X, Zhang W, et al. Clinical characteristics and intrauterine vertical  
565 transmission potential of COVID-19 infection in nine pregnant women: a retrospective review of  
566 medical records. *Lancet.* 2020 Mar;395(10226):809–15. [https://doi.org/10.1016/S0140-  
567 6736\(20\)30360-3](https://doi.org/10.1016/S0140-6736(20)30360-3) PMID: 32151335
- 568 13. Zheng YY, Ma YT, Zhang JY, Xie X. COVID-19 and the cardiovascular system. *Nat Rev Cardiol.* 2020  
569 Mar;17:259–60. <https://doi.org/10.1038/s41569-020-0360-5> PMID: 32139904
- 570 14. Dandekar AA, Perlman S. Immunopathogenesis of coronavirus infections: implications for SARS. *Nat*  
571 *Rev Immunol.* 2005 Dec;5(12):917–27. <https://doi.org/10.1038/nri1732> PMID: 16322745
- 572 15. Gu J, Gong E, Zhang B, Zheng J, Gao Z, Zhong Y, et al. Multiple organ infection and the pathogenesis  
573 of SARS. *J Exp Med.* 2005 Aug;202(3):415–24. <https://doi.org/10.1084/jem.20050828> PMID:  
574 16043521
- 575 16. Jia X, Yin C, Lu S, Chen Y, Liu Q, Bai J, et al. Two things about COVID-19 might need attention.  
576 Preprints. 2020 Feb. <https://doi.org/10.20944/preprints202002.0315.v1>
- 577 17. Simonnet A, Chetboun M, Poissy J, Raverdy V, Noulette J, Duhamel A, et al. High prevalence of  
578 obesity in severe acute respiratory syndrome coronavirus-2 (SARS-CoV-2) requiring invasive  
579 mechanical ventilation. *Obesity.* 2020 Apr;28(7):1196–9. <https://doi.org/10.1002/oby.22831> PMID:  
580 32271993
- 581 18. Elliot JG, Donovan GM, Wang KCW, Green FHY, James AL, Noble PB, et al. Fatty airways: Implications  
582 for obstructive disease. *Eur Respir J.* 2019 Dec;54(6):1900857.  
583 <https://doi.org/10.1183/13993003.00857-2019> PMID: 31624112
- 584 19. Ziebuhr J Snijder EJ, Gorbalenya AE. Virus-encoded proteinases and proteolytic processing in the  
585 *Nidovirales*. *J Gen Virol.* 2000 Apr;81(4):853–79. <https://doi.org/10.1099/0022-1317-81-4-853> PMID:  
586 10725411
- 587 20. Baez-Santos YM, St. John SE, Mesecar AD. The SARS-coronavirus papain-like protease: Structure,  
588 function and inhibition by designed antiviral compounds. *Antiviral Res.* 2015 Mar;115:21–38.  
589 <https://doi.org/10.1016/j.antiviral.2014.12.015> PMID: 25554382
- 590 21. Pillaiyar T, Manickam M, Namasivayam V, Hayashi Y, Jung SH. An overview of severe acute  
591 respiratory syndrome-coronavirus (SARS-CoV) 3CL protease inhibitors: Peptidomimetics and small  
592 molecule chemotherapy. *J Med Chem.* 2016 Feb;59(14):6595–628.  
593 <https://doi.org/10.1021/acs.jmedchem.5b01461> PMID: 26878082
- 594 22. Yang H, Xie W, Xue X, Yang K, Ma J, Liang W, et al. Design of wide-spectrum inhibitors targeting  
595 coronavirus main proteases. *PLOS Biology.* 2005 Nov;3(10):e428.  
596 <https://doi.org/10.1371/journal.pbio.0030324> PMID: 16128623
- 597 23. Anand K, Ziebuhr J, Wadhvani P, Mesters JR, Hilgenfeld R. Coronavirus main proteinase (3CLpro)  
598 structure: Basis for design of anti-SARS drugs. *Science.* 2003 Jun;300(5626):1763–7.  
599 <https://doi.org/10.1126/science.1085658> PMID: 12746549
- 600 24. Neimeyer D, Mosbauer K, Klein EM, Sieberg A, Mettelman RC, Mielech AM, et al. The papain-like  
601 protease determines a virulence trait that varies among members of the SARS-coronavirus species.  
602 *PLOS Pathog.* 2018 Sep;14(9):e1007296. <https://doi.org/10.1371/journal.ppat.1007296> PMID:  
603 30248143

- 604 25. Barretto N, Jukneliene D, Ratia K, Chen Z, Mesecar AD, Baker SC. The papain-like protease of severe  
605 acute respiratory syndrome coronavirus has deubiquinating activity. *J Virol*. 2005 Dec;79(24):15189–  
606 98. <https://doi.org/10.1128/JVI.79.24.15189-15198.2005> PMID: 16306590
- 607 26. Yang X, Chen X, Bian G, Tu J, Xing Y, Wang Y, et al. Proteolytic processing, deubiquitinase and  
608 interferon antagonist activities of Middle East respiratory syndrome coronavirus papain-like  
609 protease. *J Gen Virol*. 2014 Mar;95(3):614–26. <https://doi.org/10.1099/vir.0.059014-0> PMID:  
610 24362959
- 611 27. Bailey-Elkin BA, Knaap RCM, Johnson GG, Dalebout TJ, Ninaber DK, van Kasteren PB, et al. Crystal  
612 structure of the Middle East respiratory syndrome coronavirus (MERS-CoV) papain-like protease  
613 bound to ubiquitin facilitates targeted disruption of deubiquinating activity to demonstrate its role  
614 in innate immune suppression. *J Biol Chem*. 2014 Dec;289:34667–82.  
615 <https://doi.org/10.1074/jbc.M114.609644> PMID: 25320088
- 616 28. Li SW, Lai CC, Ping JF, Tsai FJ, Wan L, Lin YJ, et al. Severe acute respiratory syndrome coronavirus  
617 papain-like protease suppressed alpha interferon-induced responses through downregulation of  
618 extracellular signal-regulated kinase 1-mediated signalling pathways. *J Gen Virol*. 2011  
619 May;92(5):1127–40. <https://doi.org/10.1099/vir.0.028936-0> PMID: 21270289
- 620 29. Xing Y, Chen J, Tu J, Zhang B, Chen X, Shi H, et al. The papain-like protease of porcine epidemic  
621 diarrhea virus negatively regulates type I interferon pathway by acting as a viral deubiquitinase. *J*  
622 *Gen Virol*. 2013 Jul;94(7):1554–67. <https://doi.org/10.1099/vir.0.051169-0> PMID: 23596270
- 623 30. Matthews K, Schafer A, Pham A, Frieman M. The SARS coronavirus papain like protease can inhibit  
624 IRF3 at a post activation step that requires deubiquination activity. *Virol J*. 2014 Dec;11:209.  
625 <https://doi.org/10.1186/s12985-014-0209-9> PMID: 25481026
- 626 31. Devaraj SG, Wang N, Chen Z, Chen Z, Tseng M, Barretto N, et al. Regulation of IRF-3-dependent  
627 innate immunity by the papain-like protease domain of the severe acute respiratory syndrome  
628 coronavirus. *J Biol Chem*. 2007 Nov;282:32208–21. <https://doi.org/10.1074/jbc.M704870200> PMID:  
629 17761676
- 630 32. Banerjee A, Zhang X, Yip A, Schulz KS, Irving AT, Bowdish D, et al. Positive selection of a serine  
631 residue in bat IRF3 confers enhanced antiviral protection. *iScience*. 2020 Mar;23(7):100958.  
632 <https://doi.org/10.1016/j.isci.2020.100958> PMID: 32179480
- 633 33. Zhou P, Yang XL, Wang XG, Hu B, Zhang L, Zhang W, et al. A pneumonia outbreak associated with a  
634 new coronavirus of probable bat origin. *Nature*. 2020 Feb;579:270–3.  
635 <https://doi.org/10.1038/s41586-020-2012-7> PMID: 32015507
- 636 34. Needle D, Lountos GT, Waugh DS. Structures of the Middle East respiratory syndrome coronavirus  
637 3C-like protease reveal insights into substrate specificity. *Acta Cryst*. 2015 Feb;D71:1102–11.  
638 <https://doi.org/10.1107/S1399004715003521> PMID: 25945576
- 639 35. Xue X, Yu H, Yang H, Xue F, Wu Z, Shen W, et al. Structures of two coronavirus main proteases:  
640 Implications for substrate binding and antiviral drug design. *J Virol*. 2008 Mar;82(5):2515–27.  
641 <https://doi.org/10.1128/JVI.02114-07> PMID: 18094151
- 642 36. Anand K, Palm GJ, Mesters JR, Siddell SG, Ziebuhr J, Hilgenfeld R. Structure of coronavirus main  
643 proteinase reveals combination of a chymotrypsin fold with an extra  $\alpha$ -helical domain. *EMBO J*. 2002  
644 Jul;21(13):3213–24. <https://doi.org/10.1093/emboj/cdf327> PMID: 12093723
- 645 37. Zhu X, Wang D, Zhou J, Pan T, Chen J, Yang Y, et al. Porcine deltacoronavirus nsp5 antagonizes type I  
646 interferon signaling by cleaving STAT2. *J Virol*. 2017 May;91(10):e00003–17.  
647 <https://doi.org/10.1128/JVI.00003-17> PMID: 28250121
- 648 38. Wang, D, Fang L, Shi Y, Zhang H, Gao L, Peng G, et al. Porcine epidemic diarrhea virus 3C-like  
649 protease regulates its interferon antagonism by cleaving NEMO. *J Virol*. 2016 Feb;90(4):2090–101.  
650 <https://doi.org/10.1128/JVI.02514-15> PMID: 26656704

- 651 39. Moustaqil M, Ollivier E, Chiu HP, Van Tol S, Ruffolff-Soto P, Stevens C, et al. SARS-CoV-2 proteases  
652 cleave IRF3 and critical modulators of inflammatory pathways (NLRP12 and TAB1): implications for  
653 disease presentation across species and the search for reservoir hosts. *bioRxiv*. 2020 Jun.  
654 <https://doi.org/10.1101/2020.06.05.135699>
- 655 40. de Vries AAF, Horzinek MC, Rottier PJM, de Groot RJ. The genome organization of the *Nidovirales*:  
656 Similarities and differences between arteri-, toro-, and coronaviruses. *Sem Virol*. 1997 Feb;8(1):33–  
657 47. <https://doi.org/10.1006/smvy.1997.0104> PMID: 32288441
- 658 41. Ye S, Xia H, Dong C, Cheng Z, Xia X, Zhang J, et al. Identification and characterization of Iflavirus 3C-  
659 like protease processing activities. *Virol*. 2012 Jul;428(2):136–45.  
660 <https://doi.org/10.1016/j.virol.2012.04.002> PMID: 22534091
- 661 42. Kuyumcu-Martinez M, Belliot G, Sosnovtsev SV, Chang KO, Green KY, Lloyd RE. Calicivirus 3C-like  
662 proteinase inhibits cellular translation by cleavage of poly(A)-binding protein. *J Virol*. 2014  
663 Aug;78(15):8172–82. <https://doi.org/10.1128/JVI.78.15.8172-8182.2004> PMID: 15254188
- 664 43. Cordingley MG, Callahan PL, Sardana VV, Garsky VM, Colonno RJ. Substrate requirements of human  
665 rhinovirus 3C protease for peptide cleavage *in vitro*. *J Biol Chem*. 1990 Jun;265(16):9062–5. PMID:  
666 2160953
- 667 44. Pallai PV, Burkhardt F, Skoog M, Schreiner K, Bax P, Cohen KA, et al. Cleavage of synthetic peptides  
668 by purified poliovirus 3C proteinase. *J Biol Chem*. 1989 Jun;264(17):9738–41. PMID: 2542331
- 669 45. Dougherty WG, Semler BL. Expression of virus-encoded proteinases: Functional and structural  
670 similarities with cellular enzymes. *Microbiol Rev*. 1993 Dec;57(4):781–822. PMID: 8302216
- 671 46. Tesar M, Marquardt O. Foot-and-mouth disease virus protease 3C inhibits cellular transcription and  
672 mediated cleavage of histone H3. *Virology*. 1990 Feb;174(2):364–74. [https://doi.org/10.1016/0042-  
673 6822\(90\)90090-e](https://doi.org/10.1016/0042-6822(90)90090-e) PMID: 2154880
- 674 47. Falk MM, Grigera PR, Gergmann IE, Zibert A, Multhaup G, Beck E. Foot-and-mouth disease virus  
675 protease 3C induces specific proteolytic cleavage of host cell histone H3. *J Virol*. 1990  
676 Feb;64(2):748–56. <https://doi.org/10.1128/JVI.64.2.748-756.1990> PMID: 2153239
- 677 48. Kliewer S, Dasgupta A. An RNA polymerase II transcription factor inactivated in poliovirus-infected  
678 cells copurifies with transcription factor TFIID. *Mol Cell Biol*. 1988 Aug;8(8):3175–82.  
679 <https://doi.org/10.1128/mcb.8.8.3175> PMID: 2850483
- 680 49. Clark ME, Dasgupta A. A transcriptionally active form of TFIIC is modified in poliovirus-infected HeLa  
681 cells. *Mol Cell Biol*. 1990 Oct;10(10):5106–13. <https://doi.org/10.1128/mcb.10.10.5106> PMID:  
682 2204807
- 683 50. Clark ME, Hammerle T, Wimmer E, Dasgupta A. Poliovirus proteinase 3C converts an active form of  
684 transcription factor IIC to an inactive form: A mechanism for inhibition of host cell polymerase III  
685 transcription by poliovirus. *EMBO J*. 1991 Oct;10(10):2941–7. [https://doi.org/10.1002/j.1460-  
686 2075.1991.tb07844.x](https://doi.org/10.1002/j.1460-2075.1991.tb07844.x) PMID: 1915271
- 687 51. Clark ME, Lieberman PM, Berk AJ, Dasgupta A. Direct cleavage of human TATA-binding protein by  
688 poliovirus protease 3C *in vivo* and *in vitro*. *Mol Cell Bio*. 1993 Feb;13(2):1232–7.  
689 <https://doi.org/10.1128/mcb.13.2.1232> PMID: 8380894
- 690 52. Shen Y, Igo M, Yalamanchili P, Berk AJ, Dasgupta A. DNA binding domain and subunit interactions of  
691 transcription factor IIC revealed by dissection with poliovirus 3C protease. *Mol Cell Biol*. 1996  
692 Aug;16(8):4163–71. <https://doi.org/10.1128/mcb.16.8.4163> PMID: 8754815
- 693 53. Joachims M, Etchison D. Poliovirus infection results in structural alteration of a microtubule-  
694 associated protein. *J Virol*. 1992 Oct;66(10):5797–804. [https://doi.org/10.1128/JVI.66.10.5797-  
695 5804.1992](https://doi.org/10.1128/JVI.66.10.5797-5804.1992) PMID: 1326643
- 696 54. Joachims M, Harris KS, Etchison D. Poliovirus protease 3C mediates cleavage of microtubule-  
697 associated protein 4. *Virology*. 1995 Aug;211(2):451–61. <https://doi.org/10.1006/viro.1995.1427>  
698 PMID: 7645249



- 699 55. Thiel V, Ivanov KA, Putics A, Hertzog T, Schelle B, Bayer S, et al. Mechanisms and enzymes involved in  
700 SARS coronavirus genome expression. *J Gen Virol*. 2003 Sep;84(9):2305–15.  
701 <https://doi.org/10.1099/vir.0.19424-0> PMID: 12917450
- 702 56. Chuck CP, Chow HF, Wan DCC, Wong KB. Profiling of substrate specificities of 3C-like proteases from  
703 group 1, 2a, 2b, and 3 coronaviruses. *PLOS One*. 2011 Nov;6(11):e27228.  
704 <https://doi.org/10.1371/journal.pone.0027228> PMID: 22073294
- 705 57. Gao F, Ou HY, Chen LL, Zheng WX, Zhang CT. Prediction of proteinase cleavage sites in polyproteins  
706 of coronaviruses and its applications in analyzing SARS-CoV genomes. *FEBS Lett*. 2003  
707 Oct;553(3):451–6. [https://doi.org/10.1016/s0014-5793\(03\)01091-3](https://doi.org/10.1016/s0014-5793(03)01091-3) PMID: 14572668
- 708 58. Yang ZR. Mining SARS-CoV protease cleavage data using non-orthogonal decision trees: a novel  
709 method for decisive template selection. *Bioinformatics*. 2005 Jun;21(11):2644–50.  
710 <https://doi.org/10.1093/bioinformatics/bti404> PMID: 15797903
- 711 59. Kiemer L, Lund O, Brunak S, Blom N. Coronavirus 3CLpro proteinase cleavage sites: Possible  
712 relevance to SARS virus pathology. *BMC Bioinform*. 2004 Jun;5:72. <https://doi.org/10.1186/1471-2105-5-72> PMID: 15180906
- 713 60. Blom N, Hansen J, Blaas D, Brunak S. Cleavage site analysis in picornaviral polyproteins: Discovering  
714 cellular targets by neural networks. *Protein Science*. 1996 Sep;5(11):2203–16.  
715 <https://doi.org/10.1002/pro.5560051107> PMID: 8931139
- 716 61. Narayanan A, Wu X, Yang ZR. Mining viral protease data to extract cleavage knowledge.  
717 *Bioinformatics*. 2002 Jul;18(1):S5–13. [https://doi.org/10.1093/bioinformatics/18.suppl\\_1.s5](https://doi.org/10.1093/bioinformatics/18.suppl_1.s5) PMID:  
718 12169525
- 719 62. Singh O, Su ECY. Prediction of HIV-1 protease cleavage site using a combination of sequence,  
720 structural, and physiochemical features. *BMC Bioinform*. 2016 Dec;17(Suppl 17):478.  
721 <https://doi.org/10.1186/s12859-016-1337-6> PMID: 28155640
- 722 63. Li X, Hu H, Shu L. Predicting human immunodeficiency virus protease cleavage sites in nonlinear  
723 projection space. *Mol Cell Biochem*. 2010 Jan;339(1–2):127–33. <https://doi.org/10.1007/s11010-009-0376-y> PMID: 20054614
- 724 64. Rognvaldsson T, You L. Why neural networks should not be used for HIV-1 protease cleavage site  
725 prediction. *Bioinformatics*. 2004 Feb;20(11):1702–9. <https://doi.org/10.1093/bioinformatics/bth144>  
726 PMID: 14988129
- 727 65. You L, Garwicz D, Rognvaldsson T. Comprehensive bioinformatic analysis of the specificity of human  
728 immunodeficiency virus type 1 protease. *J Virol*. 2005 Oct;79(19):12477–86.  
729 <https://doi.org/10.1128/JVI.79.19.12477-12486.2005> PMID: 16160175
- 730 66. Cai YD, Chou KC. Artificial neural network model for predicting HIV protease cleavage sites in  
731 protein. *Adv Eng Softw*. 1998 Mar;29(2):119–28. [https://doi.org/10.1016/S0965-9978\(98\)00046-5](https://doi.org/10.1016/S0965-9978(98)00046-5)
- 732 67. Manning T, Walsh P. The importance of physiochemical characteristics and nonlinear classifiers in  
733 determining HIV-1 protease specificity. *Bioengineered*. 2016 Mar–Apr;7(2):65–78.  
734 <https://doi.org/10.1080/21655979.2016.1149271> PMID: 27212259
- 735 68. Chown H. A comparison of machine learning algorithms for the prediction of hepatitis C NS3  
736 protease cleavage sites. *J Proteom Bioinform*. 2019 Jul;12(5):89–95. <https://doi.org/10.35248/0974-276X.19.12.501>
- 737 69. The UniProt Consortium. UniProt: a worldwide hub of protein knowledge. *Nucleic Acids Res*. 2019  
738 Jan;47(D1):D505–15. <https://doi.org/10.1093/nar/gky1049> PMID: 30395287
- 739 70. Benson DA, Cavanaugh M, Clark K, Karsch-Mizrachi I, Lipman DJ, Ostell J. GenBank. *Nucleic Acids Res*. 2017 Jan;45(D1):D37–42. <https://doi.org/10.1093/nar/gkw1070> PMID: 27899564
- 740 71. Sievers F, Wilm A, Dineen D, Gibson TJ, Karplus K, Li W, et al. Fast, scalable generation of high-  
741 quality protein multiple sequence alignments using Clustal Omega. *Mol Syst Biol*. 2011 Oct;7:539.  
742 <https://doi.org/10.1038/msb.2011.75> PMID: 21988835
- 743  
744  
745  
746



- 747 72. Goujon M, McWilliam H, Li W, Valentin F, Squizzato S, Paern J, et al. A new bioinformatics analysis  
748 tools framework at EMBL-EBI. *Nucleic Acids Res.* 2010 Jul;38(2):W695–9.  
749 <https://doi.org/10.1093/nar/gkq313> PMID: 20439314
- 750 73. McWilliam H, Li W, Uludag M, Squizzato S, Park YM, Buso N, et al. Analysis tool web services from  
751 the EMBL-EBI. *Nucleic Acids Res.* 2013 Jul;41(W1):W597–600. <https://doi.org/10.1093/nar/gkt376>  
752 PMID: 23671338
- 753 74. Pedregosa F, Varoquaux G, Gramfort A, Michel V, Thirion B, Grisel O, et al. Scikit-learn: Machine  
754 Learning in Python. *J Mach Learn Res.* 2011 Oct;12:2825–30.  
755 <http://jmlr.csail.mit.edu/papers/v12/pedregosa11a.html>
- 756 75. Huang DW, Sherman BT, Lempicki RA. Systematic and integrative analysis of large gene lists using  
757 DAVID bioinformatics resources. *Nat Protoc.* 2009 Jan;4(1):44–57.  
758 <https://doi.org/10.1038/nprot.2008.211> PMID: 19131956
- 759 76. Huang DW, Sherman BT, Lempicki RA. Bioinformatics enrichment tools: Paths toward the  
760 comprehensive functional analysis of large gene lists. *Nucleic Acids Res.* 2009 Jan;37(1):1–13.  
761 <https://doi.org/10.1093/nar/gkn923> PMID: 19033363
- 762 77. Wu A, Wang Y, Zeng C, Huang X, Xu S, Su C, et al. Prediction and biochemical analysis of putative  
763 cleavage sites of the 3C-like protease of Middle East respiratory syndrome coronavirus. *Virus Res.*  
764 2015 Oct;208:56–65. <https://doi.org/10.1016/j.virusres.2015.05.018> PMID: 26036787
- 765 78. van der Maaten L, Hinton G. Visualizing data using t-SNE. *J Mach Learn Res.* 2008 Nov;9:2579–605.  
766 <http://www.jmlr.org/papers/v9/vandermaaten08a.html>
- 767 79. Chou KC, Zhang CT, Kezdy FJ. A vector projection approach to predicting HIV protease cleavage sites  
768 in proteins. *Proteins.* 1993 Jun;16(2):195–204. <https://doi.org/10.1002/prot.340160206> PMID:  
769 8332607
- 770 80. Bindewald E, Schneider TD, Shapiro BA. CorreLogo: an online server for 3D sequence logos of RNA  
771 and DNA alignments. *Nucleic Acids Res.* 2006 Jul;34:W405–11. <https://doi.org/10.1093/nar/gkl269>  
772 PMID: 16845037
- 773 81. Maes F, Vandermeulen D, Suetens P. Medical image registration using mutual information. *Proc*  
774 *IEEE.* 2003 Oct;91(10):1699–722. <https://doi.org/10.1109/JPROC.2003.817864>
- 775 82. Crooks GE, Hon G, Chandonia JM, Brenner SE. WebLogo: A sequence logo generator. *Genome Res.*  
776 2004 Jun;14:1188–90. <https://doi.org/10.1101/gr.849004> PMID: 15173120
- 777 83. Kultys M, Nicholas L, Schwarz R, Goldman N, King J. Sequence Bundles: a novel method for  
778 visualizing, discovering and exploring sequence motifs. *BMC Proc.* 2014 Aug;8(Suppl 2):S8.  
779 <https://doi.org/10.1186/1753-6561-8-S2-S8> PMID: 25237395
- 780 84. Goetz DH, Choe Y, Hansell E, Chen YT, McDowell M, Jonsson CB, et al. Substrate specificity profiling  
781 and identification of a new class of inhibitor for the major protease of the SARS coronavirus.  
782 *Biochemistry.* 2007 Jul;46(30):8744–52. <https://doi.org/10.1021/bi0621415> PMID: 17605471
- 783 85. Woo PCY, Huang Y, Lau SKP, Tsoi HW, Yuen KY. *In silico* analysis of ORF1ab in coronavirus HKU1  
784 genome reveals a unique putative cleavage site of coronavirus HKU1 3C-like protease. *Microbiol*  
785 *Immunol.* 2005 Oct;49(10):899–908. <https://doi.org/10.1111/j.1348-0421.2005.tb03681.x> PMID:  
786 16237267
- 787 86. Ma Y, Wu Y, Shaw N, Gao Y, Wang J, Sun Y, et al. Structural basis and functional analysis of the SARS  
788 coronavirus nsp14–nsp10 complex. *PNAS.* 2015 Jul;112(30):9436–41.  
789 <https://doi.org/10.1073/pnas.1508686112> PMID: 26159422
- 790 87. Neuman BW, Chamberlain P, Bowden F, Joseph J. Atlas of coronavirus replicase structure. *Virus Res.*  
791 2014 Dec;194:49–66. <https://doi.org/10.1016/j.virusres.2013.12.004> PMID: 24355834
- 792 88. Fang SG, Shen H, Wang J, Tay FPL, Liu DX. Proteolytic processing of polyproteins 1a and 1ab between  
793 non-structural proteins 10 and 11/12 of *Coronavirus* infectious bronchitis virus is dispensable for

- 794 viral replication in cultured cells. *Viol.* 2008 Sep;379(2):175–80.  
795 <https://doi.org/10.1016/j.viol.2008.06.038> PMID: 18678384
- 796 89. Santos MS, Soares JP, Abreu PH, Araujo H, Santos J. Cross-validation for imbalances datasets:  
797 Avoiding overoptimistic and overfitting approaches. *IEEE Comp Intell Mag.* 2018 Nov;13(4):59–76.  
798 <https://doi.org/10.1109/MCI.2018.2866730> PMID: 27295638
- 799 90. Kozlowski LP. Proteome-pl: proteome isoelectric point database. *Nucleic Acids Res.* 2017  
800 Jan;45(D1):D1112–6. <https://doi.org/10.1093/nar/gkw978> PMID: 27789699
- 801 91. Fan K, Wei P, Feng Q, Chen S, Huang C, Ma L, et al. Biosynthesis, purification, and substrate  
802 specificity of severe acute respiratory syndrome coronavirus 3C-like proteinase. *J Biol Chem.* 2004  
803 Jan;279(3):1637–42. <https://doi.org/10.1074/jbc.M310875200> PMID: 14561748
- 804 92. Hegyi A, Ziebuhr J. Conservation of substrate specificities among coronavirus main proteases. *J Gen*  
805 *Viol.* 2002 Mar;83(3):595–99. <https://doi.org/10.1099/0022-1317-83-3-595> PMID: 11842254
- 806 93. Grum-Tokars V, Ratia K, Begaye A, Baker SC, Mesecar AD. Evaluating the 3C-like protease activity of  
807 SARS-coronavirus: Recommendations for standardized assays for drug discovery. *Virus Res.* 2008  
808 Apr;133(1):63–73. <https://doi.org/10.1016/j.virusres.2007.02.015> PMID: 17397958
- 809 94. Fan K, Ma L, Han X, Liang H, Wei P, Liu Y, et al. The substrate specificity of SARS coronavirus 3C-like  
810 proteinase. *Biochem Biophys Res Commun.* 2005 Apr;329(3):934–40.  
811 <https://doi.org/10.1016/j.bbrc.2005.02.061> PMID: 15752746
- 812 95. Ikemura T, Schwarze J, Makela M, Kanehiro A, Joetham A, Ohmori K, et al. Type 4 phosphodiesterase  
813 inhibitors attenuate respiratory syncytial virus-induced airway hyper-responsiveness and lung  
814 eosinophilia. *J Pharmacol Exp Ther.* 2000 Aug;294(2):701–6.  
815 <https://pubmed.ncbi.nlm.nih.gov/10900250/> PMID: 10900250
- 816 96. Mori I, Goshima F, Imai Y, Kohsaka S, Sugiyama T, Yoshida T, et al. Olfactory receptor neurons  
817 prevent dissemination of neurovirulent influenza A virus into the brain by undergoing virus-induced  
818 apoptosis. *J Gen Virol.* 2002 Sep;83(9):2109–16. <https://doi.org/10.1099/0022-1317-83-9-2109>  
819 PMID: 12185263
- 820 97. Thomander L, Aldskogius H, Vahlne A, Kristensson K, Thomas E. Invasion of cranial nerves and brain  
821 stem by herpes simplex virus inoculated into the mouse tongue. *Ann Ontol Rhinol Laryngol.* 1988  
822 Sep;97(5):554–8. <https://doi.org/10.1177/000348948809700525> PMID: 2845851
- 823 98. Chilvers MA, McKean M, Rutman A, Myint BS, Silverman M, O'Callaghan C. The effects of  
824 coronavirus of human nasal ciliated respiratory epithelium. *Eur Respir J.* 2001 Dec;18(6):965–70.  
825 <https://doi.org/10.1183/09031936.01.00093001> PMID: 11829103
- 826 99. Kuek LE, Lee RJ. First contact: the role of respiratory cilia in host-pathogen interactions in the  
827 airways. *Am J Physiol Lung Cell Mol Physiol.* 2020 Oct;319(4):L603–19.  
828 <https://doi.org/10.1152/ajplung.00283.2020> PMID: 32783615
- 829 100. Li W, Li M, Ou G. COVID-19, cilia, and smell. *FEBS J.* 2020 Sep;287(17):3672–6.  
830 <https://doi.org/10.1111/febs.15491> PMID: 32692465
- 831 101. Gordon DE, Jang GM, Bouhaddou M, Xu J, Obernier K, White KM, et al. A SARS-CoV-2 protein  
832 interaction map reveals targets for drug repurposing. *Nature.* 2020 Jul;583:459–68.  
833 <https://doi.org/10.1038/s41586-020-2286-9> PMID: 32353859
- 834 102. Lv X, Li Z, Guan J, Hu S, Zhang J, Lan Y, et al. Porcine hemagglutinating encephalomyelitis virus  
835 activation of the integrin  $\alpha 5\beta 1$ -FAK-cofilin pathway causes cytoskeletal rearrangement to promote  
836 its invasion of N2a cells. *J Virol.* 2019 Mar;93(5):e01736–18. <https://doi.org/10.1128/JVI.01736-18>  
837 PMID: 30541856
- 838 103. Rudiger AT, Mayrhofer P, Ma-Lauer Y, Pohlentz G, Muthing J, von Brunn A, et al. Tubulins  
839 interact with porcine and human S proteins of the genus *Alphacoronavirus* and support successful  
840 assembly and release of infectious viral particles. *Viol.* 2016 Oct;497:185–97.  
841 <https://doi.org/10.1016/j.viol.2016.07.022> PMID: 27479465

- 842 104. Ohman T, Rintahaka J, Kalkkinen N, Matikainen S, Nyman TA. Actin and RIG-I/MAVS signaling  
843 components translocate to mitochondria upon influenza A virus infection of human primary  
844 macrophages. *J Immunol.* 2009 May;182(9):5682–92. <https://doi.org/10.4049/jimmunol.0803093>  
845 PMID: 19380815
- 846 105. Dohner K, Sodeik B. The role of the cytoskeleton during viral infection. *Curr Top Microbiol.* 2005  
847 Feb;285:67–108. [https://doi.org/10.1007/3-540-26764-6\\_3](https://doi.org/10.1007/3-540-26764-6_3) PMID: 15609501
- 848 106. Naghavi MH, Walsh D. Microtubule regulation and function during virus infection. *J Virol.* 2017  
849 Aug;91(16):e00538–17. <https://doi.org/10.1128/JVI.00538-17> PMID: 28615197
- 850 107. Kristensson K, Lyche E, Roytta M, Svennerholm B, Vahlne A. Neuritic transport of herpes simplex  
851 virus in rat sensory neurons in vitro. Effects of substances interacting with microtubular function and  
852 axonal flow [nocodazole, taxol, and erythron-9-3-(2-hydroxynonyl)adenine]. *J Gen Virol.* 1986  
853 Sep;67:2023–8. <https://doi.org/10.1099/0022-1317-67-9-2023> PMID: 2427647
- 854 108. Solov'eva MF, Krispin TI, Shloma DV, Kalmakhelidze KA, Balandin IG. Effect of inhibitors that  
855 destroy cytoskeleton structures on the antiviral and antiproliferative activity of interferons. *Vopr*  
856 *Virusol.* 1988 May–Jun;33(3):309–14. <https://pubmed.ncbi.nlm.nih.gov/2459850/> PMID: 2459850
- 857 109. Yi F, Guo J, Dabbagh D, Spear M, He S, Kehn-Hall K, et al. Discovery of novel small-molecule  
858 inhibitors of LIM domain kinase for inhibiting HIV-1. *J Virol.* 2017 Apr;91(13):e02418–16.  
859 <https://doi.org/10.1128/JVI.02418-16> PMID: 28381571
- 860 110. Campbell EM, Nunez R, Hope TJ. Disruption of the actin cytoskeleton can complement the ability  
861 of Nef to enhance HIV-1 infectivity. *J Virol.* 2004 Jun;78(11):5745–55.  
862 <https://doi.org/10.1128/JVI.78.11.5745-5755.2004> PMID: 15140972
- 863 111. Wolff G, Melia CE, Snijder EJ, Barcena M. Double-membrane vesicles as platforms for viral  
864 replication. *Trends in Microbiol.* 2020 Jun;1839. <https://doi.org/10.1016/j.tim.2020.05.009> PMID:  
865 32536523
- 866 112. Neuman BW, Angelini MM, Buchmeier MJ. Does form meet function in the coronavirus  
867 replicative organelle? *Trends in Microbiol.* 2014 Nov;22(11):642–7.  
868 <https://doi.org/10.1016/j.tim.2014.06.003> PMID: 25037114
- 869 113. Miller E, Antony B, Hamamoto S, Schekman R. Cargo selection into COPII vesicles is driven by  
870 the Sec24p subunit. *EMBO J.* 2002 Nov;21(22):6105–13. <https://doi.org/10.1093/emboj/cdf605>  
871 PMID: 12426382
- 872 114. Mancias JD, Goldberg J. Structural basis of cargo membrane protein discrimination by the  
873 human COPII coat machinery. *EMBO J.* 2008 Oct;27(21):2918–28.  
874 <https://doi.org/10.1038/emboj.2008.208> PMID: 18843296
- 875 115. Stagg SM, Gurkan C, Fowler DM, LaPointe P, Foss TR, Potter CS, et al. Structure of the Sec13/31  
876 COPII coat cage. *Nature.* 2006 Jan;439:234–8. <https://doi.org/10.1038/nature04339> PMID:  
877 16407955
- 878 116. Nagesh PT, Husain M. Influenza A virus dysregulates host histone deacetylase 1 that inhibits viral  
879 infection in lung epithelial cells. *J Virol.* 2016 Apr;90(6):4614–25. [https://doi.org/10.1128/JVI.00126-  
880 16](https://doi.org/10.1128/JVI.00126-16) PMID: 26912629
- 881 117. Chen H, Qian Y, Chen X, Ruan Z, Ye Y, Chen H, et al. HDAC6 restricts influenza A virus by  
882 deacetylation of the RNA polymerase PA subunit. *J Virol.* 2019 Feb;93(4):e01896–18.  
883 <https://doi.org/10.1128/JVI.01896-18> PMID: 30518648
- 884 118. Shulak L, Beljanski V, Chiang C, Dutta SM, Van Grevenynghe J, Belgnaou SM, et al. Histone  
885 deacetylase inhibitors potentiate vesicular stomatitis virus oncolysis in prostate cancer cells by  
886 modulating NF- $\kappa$ B-dependent autophagy. *J Virol.* 2014 Feb;88(5):2927–40.  
887 <https://doi.org/10.1128/JVI.03406-13> PMID: 24371063

- 888 119. Feng Q, Su Z, Song S, Xu H, Zhang B, Yi L, et al. Histone deacetylase inhibitors suppress RSV  
889 infection and alleviate virus-induced airway inflammation. *Int J Mol Med*. 2016 Jul;38(3):812–22.  
890 <https://doi.org/10.3892/ijmm.2016.2691> PMID: 27460781
- 891 120. Mosley AJ, Meekings KN, McCarthy C, Shepherd D, Cerundolo V, Mazitschek R, et al. Histone  
892 deacetylase inhibitors increase virus gene expression but decrease CG8+ cell antiviral function in  
893 HTLV-1 infection. *Blood*. 2006 Dec;108(12):3801–7. <https://doi.org/10.1182/blood-2006-03-013235>  
894 PMID: 16912225
- 895 121. Kaminsky V, Zhivotovsky B. To kill or be killed: how viruses interact with the cell death  
896 machinery. *J Intern Med*. 2010 May;267:473–82. <https://doi.org/10.1111/j.1365-2796.2010.02222.x>  
897 PMID: 20433575
- 898 122. Spencer CA, Kruhlak MJ, Jenkins HL, Sun X, Bazett-Jones DP. Mitotic transcription repression *in*  
899 *vivo* in the absence of nucleosomal chromatin condensation. *J Cell Bio*. 2000 Jul;150(1):13–26.  
900 <https://doi.org/10.1083/jcb.150.1.13> PMID: 10893252
- 901 123. Banerjee S, An S, Zhou A, Silverman RH, Makino S. RNase L-independent specific 28S rRNA  
902 cleavage in murine coronavirus-infected cells. *J Virol*. 2000 Oct;74(19):8793–802.  
903 <https://doi.org/10.1128/jvi.74.19.8793-8802.2000> PMID: 10982321
- 904 124. Slavov N, Semrau S, Airoidi E, Budnik B, van Oudenaarden A. Differential stoichiometry among  
905 core ribosomal proteins. *Cell Rep*. 2015 Nov;13(5):865–73.  
906 <https://doi.org/10.1016/j.celrep.2015.09.056> PMID: 26565899
- 907 125. Plant EP, Rakauskaite R, Taylor DR, Dinman JD. Achieving a golden mean: Mechanisms by which  
908 coronaviruses ensure synthesis of the correct stoichiometric ratios of viral proteins. *J Virol*. 2019  
909 Apr;84(9):4330–40. <https://doi.org/10.1128/JVI.02480-09> PMID: 20164235
- 910 126. Park H, Subramaniam AR. Inverted translational control of eukaryotic gene expression by  
911 ribosome collisions. *PLOS Biol*. 2019 Sep;17(9):e3000396.  
912 <https://doi.org/10.1371/journal.pbio.3000396> PMID: 31532761
- 913 127. Joazeiro CAP. Mechanisms and functions of ribosome-associated protein quality control. *Nat Rev*  
914 *Mol Cell Biol*. 2019 Jun;20(6):368–83. <https://doi.org/10.1038/s41580-019-0118-2> PMID: 30940912
- 915 128. Siegal V, Walter P. Elongation arrest is not a prerequisite for secretory protein translocation  
916 across the microsomal membrane. *J Cell Biol*. 1985 Jun;100(6):1913–21.  
917 <https://doi.org/10.1083/jcb.100.6.1913> PMID: 2581979
- 918 129. Rottier P, Armstrong J, Meyer DI. Signal recognition particle-dependent insertion of coronavirus  
919 E1, an intracellular membrane glycoprotein. *J Biol Chem*. 1985 Aug;260(8):4648–52.  
920 <https://pubmed.ncbi.nlm.nih.gov/2985561/> PMID: 2985561
- 921 130. Young JC, Andrews DW. The signal recognition particle receptor alpha subunit assembles co-  
922 translationally on the endoplasmic reticulum membrane during an mRNA-encoding translation  
923 pause *in vitro*. *EMBO J*. 1996 Jan;15(1):172–81. <https://doi.org/10.1002/j.1460-2075.1996.tb00345.x>  
924 PMID: 25855820
- 925 131. Grandi N, Tramontano E. Human endogenous retroviruses are ancient acquired elements still  
926 shaping innate immune responses. *Front Immunol*. 2019 Sep;9(2039):1–16.  
927 <https://doi.org/10.3389/fimmu.2018.02039> PMID: 30250470
- 928 132. Roy M, Viginier B, Saint-Michel E, Arnaud F, Ratinier M, Fablet M. Viral infection impacts  
929 transposable element transcript amounts in *Drosophila*. *PNAS*. 2020 Jun;117(22):12249–57.  
930 <https://doi.org/10.1073/pnas.2006106117> PMID: 32434916
- 931 133. Wada M, Lokugamage KG, Nakagawa K, Narayanan K, Makino S. Interplay between coronavirus,  
932 a cytoplasmic RNA virus, and nonsense-mediated mRNA decay pathway. *PNAS*. 2018  
933 Oct;115(43):e10157–66. <https://doi.org/10.1073/pnas.1811675115> PMID: 30297408
- 934 134. Wang W, Xiong L, Wang P, Wang F, Ma Q. Major vault protein plays important roles in viral  
935 infection. *IUBMB Life*. 2020 Apr;74(4):624–31. <https://doi.org/10.1002/iub.2200> PMID: 31769934



- 936 135. Steiner E, Holzmann K, Pirker C, Elbling L, Micksche M, Sutterluty F, et al. The major vault protein  
937 is responsive to and interferes with interferon- $\gamma$ -mediated STAT1 signals. *J Cell Sci*. 2006  
938 Oct;119:459–69. <https://doi.org/10.1242/jcs.02773> PMID: 16418217
- 939 136. Li F, Chen Y, Zhang Z, Ouyang J, Wang Y, Yan R, et al. Robust expression of vault RNAs induced by  
940 influenza A virus plays a critical role in suppression of PKR-mediated innate immunity. *Nucleic Acids*  
941 *Res*. 2015 Dec;43(21):10321–37. <https://doi.org/10.1093/nar/gkv1078> PMID: 26490959
- 942 137. Bellon M, Nicot C. Regulation of telomerase and telomeres: Human tumor viruses take control. *J*  
943 *Natl Cancer Inst*. 2008 Jan;100(2):98–108. <https://doi.org/10.1093/jnci/djm269> PMID: 18182620
- 944 138. Reghunathan R, Jayapal M, Hsu LY, Chng HH, Tai D, Leung BP, et al. Expression profile of immune  
945 response genes in patients with severe acute respiratory syndrome. *BMC Immunol*. 2005 Jan;6:2.  
946 <https://doi.org/10.1186/1471-2172-6-2> PMID: 15655079
- 947 139. Berlutti F, Pantanella F, Natalizi T, Frioni A, Paesano R, Polimeni A, et al. Antiviral properties of  
948 lactoferrin—A natural immunity molecule. *Molecules*. 2011 Aug;16(8):6992–7018.  
949 <https://doi.org/10.3390/molecules16086992> PMID: 21847071
- 950 140. Adusumilli NC, Zhang D, Friedman JM, Friedman AJ. Harnessing nitric oxide for preventing,  
951 limiting and treating the severe pulmonary consequences of COVID-19. *Nitric Oxide*. 2020  
952 Oct;103:4–8. <https://doi.org/10.1016/j.niox.2020.07.003> PMID: 32681986
- 953 141. Perrone LA, Belser JA, Wadford DA, Katz JM, Tumpey TM. Inducible nitric oxide contributes to  
954 viral pathogenesis following highly pathogenic influenza virus infection in mice. *J Infect Dis*. 2013  
955 May;207(10):1576–84. <https://doi.org/10.1093/infdis/jit062> PMID: 23420903
- 956 142. Wan G, Zhaorigetu S, Liu Z, Kaini R, Jiang Z, Hu CAA. Apolipoprotein L1, a novel Bcl-2 homology  
957 domain 3-only lipid-binding protein, induces autophagic cell death. *J Biol Chem*. 2008  
958 Aug;282(31):21540–9. <https://doi.org/10.1074/jbc.M800214200> PMID: 18505729
- 959 143. Peng Y, Wan L, Fan C, Zhang P, Wang X, Sun J, et al. Cholesterol metabolism—Impact for SARS-  
960 CoV-2 infection prognosis, entry, and antiviral therapies. *medRxiv*. 2020 Apr.  
961 <https://doi.org/10.1101/2020.04.16.20068528>
- 962 144. Rebello CJ, Kirwan JP, Greenway FL. Obesity, the most common comorbidity in SARS-CoV-2: is  
963 leptin the link? *Int J Obes (Lond)*. 2020 Jul;44:1810–7. <https://doi.org/10.1038/s41366-020-0640-5>  
964 PMID: 32647360
- 965 145. Zhang AJX, To KKW, Li C, Lau CCY, Poon VKM, Chan CCS, et al. Leptin mediates the pathogenesis  
966 of severe 2009 pandemic influenza A (H1N1) infection associated with cytokine dysregulation in  
967 mice with diet-induced obesity. *J Infect Dis*. 2013 Apr;207(8):1270–80.  
968 <https://doi.org/10.1093/infdis/jit031> PMID: 23325916
- 969 146. Chesarino NM, McMichael TM, Yount JS. E3 ubiquitin ligase NEDD4 promotes influenza virus  
970 infection by decreasing levels of the antiviral protein IFITM3. *PLOS Pathog*. 2015  
971 Aug;11(8):e1005095. <https://doi.org/10.1371/journal.ppat.1005095> PMID: 26263374
- 972 147. Shi G, Ozog S, Torbett BE, Compton AA. mTOR inhibitors lower an intrinsic barrier to virus  
973 infection mediated by IFITM3. *PNAS*. 2018 Oct;115(43):e10069–78.  
974 <https://doi.org/10.1073/pnas.1811892115> PMID: 30301809
- 975 148. Xu Q, Zhu N, Chen S, Zhao P, Ren H, Zhu S, et al. E3 ubiquitin ligase Nedd4 promotes Japanese  
976 encephalitis virus replication by suppressing autophagy in human neuroblastoma cells. *Sci Rep*. 2017  
977 Mar;7:45375. <https://doi.org/10.1038/srep45375> PMID: 28349961
- 978 149. Yu J, Li M, Wilkins J, Ding S, Swartz TH, Esposito AM, et al. IFITM proteins restrict HIV-1 infection  
979 by antagonizing the envelope glycoprotein. *Cell Rep*. 2015 Oct;13:145–56.  
980 <http://doi.org/10.1016/j.celrep.2015.08.055> PMID: 26387945
- 981 150. Zhu X, He Z, Yuan J, Wen W, Huang X, Hu Y, et al. IFITM3-containing exosome as a novel  
982 mediator for anti-viral response in dengue virus infection. *Cell Microbiol*. 17(1):105–18.  
983 <https://doi.org/10.1111/cmi.12339> PMID: 25131332



- 984 151. Huang IC, Bailey CC, Weyer JL, Radoshitzky SR, Becker MM, Chiang JJ, et al. Distinct patterns of  
985 IFITM-mediated restriction of filoviruses, SARS coronavirus, and influenza A virus. *PLOS Pathog.* 2011  
986 Jan;7(1):e1001258. <https://doi.org/10.1371/journal.ppat.1001258> PMID: 21253575
- 987 152. Zhao X, Sehgal M, Hou Z, Cheng J, Shu S, Wu S, et al. Identification of residues controlling  
988 restriction versus enhancing activities of IFITM proteins on entry of human coronaviruses. *J Virol.*  
989 2018 Mar;92(6):e01535–17. <https://doi.org/10.1128/JVI.01535-17> PMID: 29263263
- 990 153. Hachim MY, Al Heialy S, Hachim IY, Halwani R, Senok AC, Maghazachi AA, et al. Interferon-  
991 induced transmembrane protein (IFITM3) is upregulated explicitly in SARS-CoV-2 infected lung  
992 epithelial cells. *Front Immunol.* 2020 Jun;11:1372. <https://doi.org/10.3389/fimmu.2020.01372>  
993 PMID: 32595654
- 994 154. Yang B, Kumar S. Nedd4 and Nedd4-2: closely related ubiquitin-protein ligases with distinct  
995 physiological functions. *Cell Death Differ.* 2009 Jun;17:68–77. <https://doi.org/10.1038/cdd.2009.84>  
996 PMID: 19557014
- 997 155. Han Z, Lu J, Liu Y, Davis B, Lee MS, Olson MA, et al. Small-molecule probes targeting the viral  
998 PPxY-host Nedd4 interface block egress of a broad range of RNA viruses. *J Virol.* 2014  
999 Apr;88(13):7294–306. <https://doi.org/10.1128/JVI.00591-14> PMID: 24741084
- 1000 156. An H, Krist DT, Statsyuk AV. Crosstalk between kinases and Nedd4 family ubiquitin ligases. *Mol*  
1001 *BioSyst.* 2014 Jan;10:1643–57. <https://doi.org/10.1039/C3MB70572B> PMID: 24457516
- 1002 157. Maaroufi H. SARS-CoV-2 encodes a PPxY late domain motif that is known to enhance budding  
1003 and spread in enveloped RNA viruses. *bioRxiv.* 2020 Apr.  
1004 <https://doi.org/10.1101/2020.04.20.052217>
- 1005 158. Isaacson MK, Ploegh HL. Ubiquitination, ubiquitin-like modifiers, and deubiquitination in viral  
1006 infection. *Cell Host Microbe.* 2009 Jun;5:559–70. <https://doi.org/10.1016/j.chom.2009.05.012> PMID:  
1007 19527883
- 1008 159. Zinngrebe J, Montinaro A, Peltzer N, Walczak H. Ubiquitin in the immune system. *EMBO Rep.*  
1009 2013 Nov;15(1):28–45. <https://doi.org/10.1002/embr.201338025> PMID: 24375678
- 1010 160. Steimer L, Klostermeier D. RNA helicases in infection and disease. *RNA Biol.* 2012 Jun;9(6):751–  
1011 771. <https://doi.org/10.4161/rna.20090> PMID: 22699555
- 1012 161. Sharma A, Boris-Lawrie K. Determination of host RNA helicases activity in viral replication.  
1013 *Methods Enzymol.* 2012 Jun;511:405–35. <https://doi.org/10.1016/B978-0-12-396546-2.00019-X>  
1014 PMID: 22713331
- 1015 162. Umate P, Tuteja N, Tuteja R. Genome-wide comprehensive analysis of human helicases.  
1016 *Commun Integr Biol.* 2011 Jan–Feb;4(1):118–37. <https://doi.org/10.4161/cib.4.1.13844> PMID:  
1017 21509200
- 1018 163. Xu L, Khadijah S, Fang S, Wang L, Tay FPL, Liu DX. The cellular RNA helicase DDX1 interacts with  
1019 coronavirus nonstructural protein 14 and enhances viral replication. *J Virol.* 2010 Sep;84(17):8571–  
1020 83. <https://doi.org/10.1128/JVI.00392-10> PMID: 20573827
- 1021 164. Chem JY, Chen WN, Poon KMV, Zheng BJ, Lin X, Wang YX, et al. Interaction between SARS-CoV  
1022 helicase and a multifunctional cellular protein (Ddx5) revealed by yeast and mammalian cell two-  
1023 hybrid systems. *Arch Virol.* 2009 Feb;154(3):507–12. <https://doi.org/10.1007/s00705-009-0323-y>  
1024 PMID: 19224332
- 1025 165. Spiezia L, Boscolo A, Poletto F, Cerruti L, Tiberio I, Campello E, et al. COVID-19-related severe  
1026 hypercoagulability in patients admitted to intensive care unit for acute respiratory failure. *Thromb*  
1027 *Haemost.* 2020 Jun;120(6):998–1000. <https://doi.org/10.1055/s-0040-1710018> PMID: 32316063
- 1028 166. Ji HL, Zhao R, Matalon S, Matthay MA. Elevated plasmin(ogen) as a common risk factor for  
1029 COVID-19 susceptibility. *Physiol Rev.* 2020 Jul;100(3):1065–75.  
1030 <https://doi.org/10.1152/physrev.00013.2020> PMID: 32216698

- 1031 167. Sottrup-Jensen L, Sand O, Kristensen L, Fey GH. The  $\alpha$ -macroglobulin bait region: Sequence  
1032 diversity and localization of cleavage sites for proteinases in five mammalian  $\alpha$ -macroglobulins. J  
1033 Biol Chem. 1989 Sep;264(27):15781–9. PMID: 2476433
- 1034 168. Gettins PGW, Hahn KH, Crews BC.  $\alpha$ 2-macroglobulin bait region variants: A role for the bait  
1035 region in tetramer formation. J Biol Chem. 1995 Jun;270(23):14160–7.  
1036 <https://doi.org/10.1074/jbc.270.23.14160> PMID: 7539801
- 1037 169. Meyer M, Jaspers I. Respiratory protease/antiprotease balance determined susceptibility to viral  
1038 infection and can be modified by nutritional antioxidants. Am J Physiol Lung Cell Mol Physiol. 2015  
1039 Apr;308:L1189–201. <https://doi.org/10.1152/ajplung.00028.2015> PMID: 25888573
- 1040 170. De Bont CM, Boelens WC, Pruijn GCM. NETosis, complement, and coagulation: a triangular  
1041 relationship. Cell Mol Immunol. 2019 Jan;16(1):19–27. <https://doi.org/10.1038/s41423-018-0024-0>  
1042 PMID: 29572545
- 1043 171. Noris M, Benigni A, Remuzzi G. The case of complement activation in COVID-19 multiorgan  
1044 impact. Kidney Intl. 2020 Aug;98(2):314–22. <https://doi.org/10.1016/j.kint.2020.05.013> PMID:  
1045 32461141
- 1046 172. Agrawal P, Nawadkar R, Ojha H, Kumar J, Sahu A. Complement evasion strategies of viruses: An  
1047 overview. Front Microbiol. 2017 Jun;8:1117. <https://doi.org/10.3389/fmicb.2017.01117> PMID:  
1048 28670306
- 1049 173. Eddie Ip WK, Chan KH, Law HKW, Tso GHW, Kong EKP, Wong WHS, et al. Mannose binding lectin  
1050 in severe acute respiratory syndrome coronavirus infection. J Infect Dis. 2005 May;191(10):1697–  
1051 704. <https://doi.org/10.1086/429631> PMID: 15838797
- 1052 174. Narasuraju T, Tang BM, Herrmann M, Muller S, Chow VTK, Radic M. Neutrophilia and NETopathy  
1053 as key pathologic drivers of progressive impairment in patients with COVID-19. Front Pharmacol.  
1054 2020 Jun;11:870. <https://doi.org/10.3389/fphar.2020.00870> PMID: 32581816
- 1055 175. Zou Y, Yalavarthi S, Shi H, Gockman K, Zuo M, Madison JA, et al. Neutrophil extracellular traps in  
1056 COVID-19. JCI Insight. 2020 Apr;5(11):e138999. <https://doi.org/10.1172/jci.insight.138999> PMID:  
1057 32329756
- 1058 176. Stahel PF, Barnum SR. Complement inhibition in coronavirus disease (COVID)-19: A neglected  
1059 therapeutic option. Front Immunol. 2020 Jul;11:1661. <https://doi.org/10.3389/fimmu.2020.01661>  
1060 PMID: 32733489
- 1061 177. De Costa MG, Poppelaars F, van Kooten C, Mollnes TE, Tedesco F, Wurzner R, et al. Age and sex-  
1062 associated changes of complement activity and complement levels in healthy Caucasian population.  
1063 Front Immunol. 2018 Nov;9:2664. <https://doi.org/10.3389/fimmu.2018.02664> PMID: 30515158
- 1064 178. Khomich OA, Kochetkov SN, Bartosch B, Ivanov AV. Redox biology of respiratory viral infections.  
1065 Viruses. 2018 Aug;10(8):392. <https://doi.org/10.3390/v10080392> PMID: 30049972
- 1066 179. Schneider D, Ganesan S, Comstock AT, Meldrum CA, Mahidhara R, Goldsmith AM, et al.  
1067 Increased cytokine response of rhinovirus-infected airway epithelial cells in chronic obstructive  
1068 pulmonary disease. Am J Respir Crit Care Med. 2010 Aug;182(3):332–40.  
1069 <https://doi.org/10.1164/rccm.200911-1673OC> PMID: 20395558  
1070

1071 **Supplementary Information**

1072 **Table S1: Significant UP\_TISSUE enrichments and depletions.**

| Enriched        |      |          |           | Depleted             |      |          |           |
|-----------------|------|----------|-----------|----------------------|------|----------|-----------|
| Tissue          | FE   | p-value  | Benjamini | Tissue               | FE   | p-value  | Benjamini |
| Plasma          | 1.56 | 1.40E-06 | 1.64E-04  | Hair root            | 1.30 | 1.22E-05 | 3.95E-03  |
| Fetal kidney    | 1.55 | 1.58E-04 | 8.14E-03  | Umbilical cord blood | 1.17 | 6.56E-09 | 4.24E-06  |
| Hepatoma        | 1.50 | 8.76E-05 | 5.83E-03  | Cajal-Retzius cell   | 1.16 | 1.69E-05 | 3.63E-03  |
| Epithelium      | 1.44 | 1.50E-37 | 7.01E-35  |                      |      |          |           |
| Amygdala        | 1.32 | 3.39E-05 | 2.63E-03  |                      |      |          |           |
| Teratocarcinoma | 1.31 | 1.62E-04 | 7.55E-03  |                      |      |          |           |
| Spleen          | 1.26 | 3.12E-05 | 2.91E-03  |                      |      |          |           |
| Testis          | 1.21 | 1.22E-17 | 1.90E-15  |                      |      |          |           |
| Brain           | 1.18 | 1.80E-30 | 4.21E-28  |                      |      |          |           |

1073 **Table S2: Significant UNIGENE\_EST\_QUARTILE enrichments and depletions.**

| Enriched                                  |      |          |           | Depleted                                |      |          |           |
|-------------------------------------------|------|----------|-----------|-----------------------------------------|------|----------|-----------|
| Tissue                                    | FE   | p-value  | Benjamini | Tissue                                  | FE   | p-value  | Benjamini |
| larynx_normal_3rd                         | 1.35 | 1.50E-26 | 1.14E-24  | salivary gland_normal_3rd               | 1.05 | 2.77E-06 | 2.10E-04  |
| oral tumor_disease_3rd                    | 1.35 | 8.45E-24 | 1.60E-22  | neonate (< 4 weeks old)_development_3rd | 1.03 | 7.94E-04 | 1.50E-02  |
| pharynx_normal_3rd                        | 1.33 | 2.62E-14 | 1.99E-13  | non-glioma_disease_3rd                  | 1.03 | 1.49E-04 | 5.65E-03  |
| laryngeal cancer_disease_3rd              | 1.33 | 2.42E-24 | 6.14E-23  | bone marrow_normal_3rd                  | 1.03 | 5.42E-04 | 1.36E-02  |
| tongue_normal_3rd                         | 1.31 | 6.07E-26 | 2.31E-24  | heart_normal_3rd                        | 1.02 | 9.88E-04 | 1.49E-02  |
| thyroid_normal_3rd                        | 1.26 | 3.36E-19 | 5.11E-18  | skin_normal_3rd                         | 1.02 | 1.59E-03 | 1.99E-02  |
| trachea_normal_3rd                        | 1.26 | 3.56E-16 | 3.66E-15  |                                         |      |          |           |
| pharyngeal tumor_disease_3rd              | 1.25 | 1.93E-09 | 1.22E-08  |                                         |      |          |           |
| thyroid tumor_disease_3rd                 | 1.23 | 1.11E-14 | 9.37E-14  |                                         |      |          |           |
| mammary gland_normal_3rd                  | 1.22 | 8.77E-18 | 1.11E-16  |                                         |      |          |           |
| colorectal tumor_disease_3rd              | 1.22 | 1.07E-14 | 1.01E-13  |                                         |      |          |           |
| breast (mammary gland) cancer_disease_3rd | 1.19 | 3.06E-11 | 2.11E-10  |                                         |      |          |           |
| adipose tissue_normal_3rd                 | 1.16 | 4.51E-07 | 2.28E-06  |                                         |      |          |           |
| colon_normal_3rd                          | 1.15 | 2.51E-09 | 1.47E-08  |                                         |      |          |           |
| uterine tumor_disease_3rd                 | 1.13 | 5.07E-07 | 2.41E-06  |                                         |      |          |           |
| eye_normal_3rd                            | 1.13 | 2.10E-08 | 1.14E-07  |                                         |      |          |           |
| muscle_normal_3rd                         | 1.12 | 7.95E-06 | 3.36E-05  |                                         |      |          |           |
| lymph node_normal_3rd                     | 1.12 | 4.02E-06 | 1.80E-05  |                                         |      |          |           |
| thymus_normal_3rd                         | 1.11 | 2.26E-04 | 9.02E-04  |                                         |      |          |           |
| ear_normal_3rd                            | 1.09 | 6.52E-03 | 2.05E-02  |                                         |      |          |           |
| pituitary gland_normal_3rd                | 1.09 | 4.07E-03 | 1.34E-02  |                                         |      |          |           |
| connective tissue_normal_3rd              | 1.08 | 8.06E-03 | 2.43E-02  |                                         |      |          |           |
| chondrosarcoma_disease_3rd                | 1.08 | 1.63E-03 | 5.90E-03  |                                         |      |          |           |
| testis_normal_3rd                         | 1.07 | 6.92E-04 | 2.63E-03  |                                         |      |          |           |

1075 **Table S3: Significant InterPro enrichments and depletions.**

| Enriched                                        |      |          |           | Depleted                                   |      |          |           |
|-------------------------------------------------|------|----------|-----------|--------------------------------------------|------|----------|-----------|
| Pfam                                            | FE   | p-value  | Benjamini | Pfam                                       | FE   | p-value  | Benjamini |
| Dynein heavy chain                              | 4.50 | 1.95E-09 | 6.57E-07  | High sulphur keratin-associated protein    | 1.29 | 1.64E-05 | 1.81E-02  |
| Dynein heavy chain domain                       | 4.50 | 1.95E-09 | 6.57E-07  | Small GTP-binding protein domain           | 1.21 | 1.20E-07 | 2.35E-04  |
| Dynein heavy chain, coiled coil stalk           | 4.50 | 1.95E-09 | 6.57E-07  | Thioredoxin-like fold                      | 1.20 | 5.50E-06 | 7.13E-03  |
| Dynein heavy chain, domain-2                    | 4.50 | 1.95E-09 | 6.57E-07  | Olfactory receptor                         | 1.20 | 1.35E-17 | 3.51E-14  |
| Dynein heavy chain, P-loop containing D4 domain | 4.50 | 8.26E-09 | 2.35E-06  | GPCR, rhodopsin-like, 7TM                  | 1.18 | 1.72E-22 | 1.35E-18  |
| ATPase, dynein-related, AAA domain              | 4.50 | 3.48E-08 | 7.60E-06  | G protein-coupled receptor, rhodopsin-like | 1.17 | 8.42E-22 | 3.29E-18  |
| Peptidase A2A, retrovirus RVP subgroup          | 4.50 | 1.04E-05 | 9.89E-04  | Kruppel-associated box                     | 1.13 | 6.74E-07 | 1.05E-03  |
| Dynein heavy chain, domain-1                    | 4.50 | 4.24E-05 | 3.41E-03  |                                            |      |          |           |

|                                                                                |      |          |          |  |  |  |
|--------------------------------------------------------------------------------|------|----------|----------|--|--|--|
| Retroviral nucleocapsid protein Gag                                            | 4.50 | 4.24E-05 | 3.41E-03 |  |  |  |
| Beta-retroviral matrix, N-terminal                                             | 4.50 | 4.24E-05 | 3.41E-03 |  |  |  |
| PH-BEACH domain                                                                | 4.50 | 1.71E-04 | 1.08E-02 |  |  |  |
| Na/K/Cl co-transporter superfamily                                             | 4.50 | 6.77E-04 | 3.62E-02 |  |  |  |
| Peptidase A2A, retrovirus, catalytic                                           | 4.09 | 4.59E-05 | 3.54E-03 |  |  |  |
| Retrovirus capsid, N-terminal core                                             | 4.05 | 1.70E-04 | 1.10E-02 |  |  |  |
| Myosin-like IQ motif-containing domain                                         | 4.03 | 1.64E-08 | 4.33E-06 |  |  |  |
| BEACH domain                                                                   | 4.00 | 6.20E-04 | 3.37E-02 |  |  |  |
| Retroviral envelope protein                                                    | 4.00 | 6.20E-04 | 3.37E-02 |  |  |  |
| MyTH4 domain                                                                   | 4.00 | 6.20E-04 | 3.37E-02 |  |  |  |
| Myosin, N-terminal, SH3-like                                                   | 3.90 | 3.24E-06 | 3.54E-04 |  |  |  |
| Myosin tail                                                                    | 3.79 | 2.35E-07 | 3.63E-05 |  |  |  |
| Spectrin/alpha-actinin                                                         | 3.57 | 1.18E-09 | 4.38E-07 |  |  |  |
| Spectrin repeat                                                                | 3.42 | 1.55E-07 | 2.61E-05 |  |  |  |
| Laminin, N-terminal                                                            | 3.38 | 9.01E-05 | 6.53E-03 |  |  |  |
| Myosin head, motor domain                                                      | 3.04 | 7.82E-09 | 2.42E-06 |  |  |  |
| Mitochondrial carrier protein                                                  | 3.00 | 6.15E-06 | 6.16E-04 |  |  |  |
| Peptidase aspartic, active site                                                | 3.00 | 1.02E-04 | 6.99E-03 |  |  |  |
| G-patch domain                                                                 | 2.96 | 1.09E-06 | 1.39E-04 |  |  |  |
| SNF2-related                                                                   | 2.96 | 1.09E-06 | 1.39E-04 |  |  |  |
| Actinin-type, actin-binding, conserved site                                    | 2.94 | 7.14E-05 | 5.28E-03 |  |  |  |
| Cadherin, N-terminal                                                           | 2.91 | 1.63E-12 | 6.71E-10 |  |  |  |
| Arf GTPase activating protein                                                  | 2.85 | 8.68E-06 | 8.46E-04 |  |  |  |
| IQ motif, EF-hand binding site                                                 | 2.85 | 1.34E-15 | 9.88E-13 |  |  |  |
| Mitochondrial carrier domain                                                   | 2.63 | 5.71E-08 | 1.11E-05 |  |  |  |
| Mitochondrial substrate/solute carrier                                         | 2.63 | 5.71E-08 | 1.11E-05 |  |  |  |
| Bromodomain, conserved site                                                    | 2.60 | 4.26E-04 | 2.40E-02 |  |  |  |
| Cadherin conserved site                                                        | 2.59 | 1.97E-15 | 1.23E-12 |  |  |  |
| HECT                                                                           | 2.57 | 2.86E-04 | 1.67E-02 |  |  |  |
| Cadherin                                                                       | 2.52 | 7.39E-15 | 3.45E-12 |  |  |  |
| Cadherin-like                                                                  | 2.51 | 5.04E-15 | 2.65E-12 |  |  |  |
| Aspartic peptidase                                                             | 2.50 | 7.04E-04 | 3.66E-02 |  |  |  |
| Laminin G domain                                                               | 2.48 | 1.38E-07 | 2.44E-05 |  |  |  |
| Forkhead-associated (FHA) domain                                               | 2.43 | 9.60E-05 | 6.69E-03 |  |  |  |
| Kinesin, motor region, conserved site                                          | 2.42 | 4.36E-05 | 3.43E-03 |  |  |  |
| Dbl homology (DH) domain                                                       | 2.41 | 3.34E-08 | 7.75E-06 |  |  |  |
| Bromodomain                                                                    | 2.41 | 2.94E-05 | 2.48E-03 |  |  |  |
| Kinesin, motor domain                                                          | 2.40 | 1.99E-05 | 1.71E-03 |  |  |  |
| Armadillo-like helical                                                         | 2.38 | 1.70E-23 | 3.15E-20 |  |  |  |
| Calponin homology domain                                                       | 2.31 | 9.23E-08 | 1.71E-05 |  |  |  |
| Ubiquitin-associated/translation elongation factor EF1B, N-terminal, eukaryote | 2.25 | 1.62E-04 | 1.07E-02 |  |  |  |
| GPS domain                                                                     | 2.25 | 7.84E-04 | 3.90E-02 |  |  |  |
| Rho GTPase activation protein                                                  | 2.23 | 3.32E-08 | 8.21E-06 |  |  |  |
| EGF-like, laminin                                                              | 2.19 | 7.78E-04 | 3.93E-02 |  |  |  |
| Zinc finger, PHD-finger                                                        | 2.17 | 1.09E-06 | 1.44E-04 |  |  |  |
| Rho GTPase-activating protein domain                                           | 2.15 | 1.08E-05 | 1.00E-03 |  |  |  |
| Band 4.1 domain                                                                | 2.12 | 2.33E-04 | 1.45E-02 |  |  |  |
| FERM domain                                                                    | 2.12 | 2.33E-04 | 1.45E-02 |  |  |  |
| FERM central domain                                                            | 2.12 | 2.33E-04 | 1.45E-02 |  |  |  |
| Armadillo-type fold                                                            | 2.09 | 7.25E-24 | 2.69E-20 |  |  |  |
| Pleckstrin homology domain                                                     | 2.04 | 2.71E-17 | 2.51E-14 |  |  |  |
| WW domain                                                                      | 2.04 | 4.62E-04 | 2.56E-02 |  |  |  |
| Zinc finger, PHD-type                                                          | 2.02 | 4.39E-06 | 4.65E-04 |  |  |  |
| Zinc finger, PHD-type, conserved site                                          | 2.02 | 9.39E-05 | 6.67E-03 |  |  |  |
| Zinc finger, FYVE/PHD-type                                                     | 1.95 | 4.92E-08 | 1.01E-05 |  |  |  |
| Helicase, superfamily 1/2, ATP-binding domain                                  | 1.92 | 3.08E-06 | 3.45E-04 |  |  |  |
| Collagen triple helix repeat                                                   | 1.92 | 7.03E-05 | 5.31E-03 |  |  |  |
| Pleckstrin homology-like domain                                                | 1.92 | 2.16E-21 | 2.67E-18 |  |  |  |
| Intermediate filament protein, conserved site                                  | 1.90 | 7.00E-04 | 3.69E-02 |  |  |  |
| Helicase, C-terminal                                                           | 1.88 | 1.12E-05 | 1.01E-03 |  |  |  |
| Peptidase C19, ubiquitin carboxyl-terminal hydrolase 2                         | 1.86 | 2.52E-04 | 1.54E-02 |  |  |  |
| AAA+ ATPase domain                                                             | 1.85 | 1.25E-06 | 1.55E-04 |  |  |  |
| PDZ domain                                                                     | 1.83 | 4.30E-07 | 6.14E-05 |  |  |  |
| Immunoglobulin I-set                                                           | 1.82 | 1.99E-06 | 2.38E-04 |  |  |  |
| Galactose-binding domain-like                                                  | 1.81 | 4.25E-04 | 2.43E-02 |  |  |  |

|                                                     |      |          |          |  |  |  |  |
|-----------------------------------------------------|------|----------|----------|--|--|--|--|
| Intermediate filament protein                       | 1.79 | 8.40E-04 | 4.12E-02 |  |  |  |  |
| von Willebrand factor, type A                       | 1.76 | 2.70E-04 | 1.60E-02 |  |  |  |  |
| Immunoglobulin E-set                                | 1.73 | 2.56E-04 | 1.54E-02 |  |  |  |  |
| Src homology-3 domain                               | 1.71 | 1.58E-07 | 2.55E-05 |  |  |  |  |
| Fibronectin, type III                               | 1.63 | 5.57E-06 | 5.73E-04 |  |  |  |  |
| Ankyrin repeat-containing domain                    | 1.60 | 9.58E-07 | 1.32E-04 |  |  |  |  |
| Ankyrin repeat                                      | 1.59 | 2.11E-06 | 2.44E-04 |  |  |  |  |
| Epidermal growth factor-like domain                 | 1.56 | 1.78E-05 | 1.57E-03 |  |  |  |  |
| Immunoglobulin subtype 2                            | 1.51 | 3.77E-05 | 3.10E-03 |  |  |  |  |
| EGF-like, conserved site                            | 1.47 | 7.18E-04 | 3.68E-02 |  |  |  |  |
| P-loop containing nucleoside triphosphate hydrolase | 1.33 | 2.45E-07 | 3.64E-05 |  |  |  |  |
| Immunoglobulin subtype                              | 1.32 | 1.42E-04 | 9.53E-03 |  |  |  |  |

1077  
1078

Table S4: Significant GO CC enrichments and depletions.

| Enriched                         |      |          |           | Depleted                       |      |          |           |
|----------------------------------|------|----------|-----------|--------------------------------|------|----------|-----------|
| CC                               | FE   | p-value  | Benjamini | CC                             | FE   | p-value  | Benjamini |
| spectrin                         | 4.55 | 3.94E-05 | 3.16E-03  | ribosome                       | 1.17 | 2.45E-05 | 1.76E-03  |
| axonemal dynein complex          | 4.09 | 1.58E-04 | 7.50E-03  | mitochondrion                  | 1.05 | 8.74E-05 | 4.13E-02  |
| spectrin-associated cytoskeleton | 3.98 | 2.08E-03 | 4.83E-02  | integral component of membrane | 1.03 | 3.75E-08 | 5.43E-05  |
| nuclear pore nuclear basket      | 3.79 | 1.36E-04 | 7.44E-03  |                                |      |          |           |
| microtubule plus-end             | 3.74 | 2.65E-06 | 4.62E-04  |                                |      |          |           |
| myosin filament                  | 3.13 | 5.56E-04 | 1.98E-02  |                                |      |          |           |
| costamere                        | 3.11 | 1.31E-04 | 7.60E-03  |                                |      |          |           |
| dynein complex                   | 3.10 | 3.13E-05 | 2.97E-03  |                                |      |          |           |
| viral capsid                     | 3.03 | 1.61E-03 | 3.93E-02  |                                |      |          |           |
| apicolateral plasma membrane     | 2.94 | 1.08E-03 | 3.38E-02  |                                |      |          |           |
| nuclear periphery                | 2.81 | 4.91E-04 | 1.88E-02  |                                |      |          |           |
| viral envelope                   | 2.73 | 1.30E-03 | 3.52E-02  |                                |      |          |           |
| desmosome                        | 2.65 | 5.75E-04 | 1.98E-02  |                                |      |          |           |
| myosin complex                   | 2.46 | 3.16E-06 | 4.72E-04  |                                |      |          |           |
| cell leading edge                | 2.22 | 6.89E-04 | 2.30E-02  |                                |      |          |           |
| adherens junction                | 2.09 | 4.20E-04 | 1.67E-02  |                                |      |          |           |
| kinesin complex                  | 2.06 | 4.00E-04 | 1.73E-02  |                                |      |          |           |
| nuclear pore                     | 1.96 | 1.38E-04 | 7.17E-03  |                                |      |          |           |
| basement membrane                | 1.90 | 1.58E-04 | 7.85E-03  |                                |      |          |           |
| microtubule                      | 1.89 | 1.55E-14 | 8.12E-12  |                                |      |          |           |
| spindle pole                     | 1.88 | 1.14E-05 | 1.49E-03  |                                |      |          |           |
| growth cone                      | 1.84 | 1.27E-05 | 1.47E-03  |                                |      |          |           |
| centriole                        | 1.77 | 7.59E-05 | 4.95E-03  |                                |      |          |           |
| recycling endosome               | 1.69 | 4.03E-04 | 1.67E-02  |                                |      |          |           |
| cytoskeleton                     | 1.69 | 2.80E-11 | 9.74E-09  |                                |      |          |           |
| PML body                         | 1.67 | 1.30E-03 | 3.60E-02  |                                |      |          |           |
| chromosome                       | 1.65 | 1.27E-03 | 3.63E-02  |                                |      |          |           |
| cell-cell junction               | 1.64 | 3.45E-05 | 3.00E-03  |                                |      |          |           |
| dendritic spine                  | 1.64 | 1.94E-03 | 4.60E-02  |                                |      |          |           |
| midbody                          | 1.62 | 5.24E-04 | 1.94E-02  |                                |      |          |           |
| synapse                          | 1.61 | 4.95E-05 | 3.69E-03  |                                |      |          |           |
| centrosome                       | 1.59 | 7.32E-10 | 1.91E-07  |                                |      |          |           |
| axon                             | 1.52 | 1.09E-04 | 6.70E-03  |                                |      |          |           |
| microtubule organizing center    | 1.52 | 1.43E-03 | 3.75E-02  |                                |      |          |           |
| actin cytoskeleton               | 1.50 | 1.87E-04 | 8.45E-03  |                                |      |          |           |
| cytoplasmic vesicle              | 1.41 | 1.20E-03 | 3.61E-02  |                                |      |          |           |
| apical plasma membrane           | 1.36 | 1.45E-03 | 3.73E-02  |                                |      |          |           |
| cell-cell adherens junction      | 1.34 | 1.54E-03 | 3.84E-02  |                                |      |          |           |
| protein complex                  | 1.30 | 1.20E-03 | 3.52E-02  |                                |      |          |           |
| cytoplasm                        | 1.18 | 1.67E-15 | 1.74E-12  |                                |      |          |           |
| nucleoplasm                      | 1.17 | 2.69E-07 | 5.62E-05  |                                |      |          |           |
| membrane                         | 1.16 | 2.10E-05 | 2.19E-03  |                                |      |          |           |
| cytosol                          | 1.12 | 6.14E-05 | 4.27E-03  |                                |      |          |           |
| nucleus                          | 1.07 | 8.52E-04 | 2.74E-02  |                                |      |          |           |

1079  
1080

Table S5: Significant GO BP enrichments and depletions.

| Enriched |    |         |           | Depleted |    |         |           |
|----------|----|---------|-----------|----------|----|---------|-----------|
| BP       | FE | p-value | Benjamini | BP       | FE | p-value | Benjamini |



|                                                                 |      |          |          |                                                                        |      |          |          |
|-----------------------------------------------------------------|------|----------|----------|------------------------------------------------------------------------|------|----------|----------|
| tRNA export from nucleus                                        | 2.63 | 3.69E-05 | 2.72E-02 | detection of chemical stimulus involved in sensory perception of smell | 1.20 | 6.97E-18 | 3.61E-14 |
| microtubule-based movement                                      | 2.46 | 4.95E-10 | 1.11E-06 | detection of chemical stimulus involved in sensory perception          | 1.25 | 1.37E-06 | 4.73E-03 |
| homophilic cell adhesion via plasma membrane adhesion molecules | 2.25 | 3.10E-14 | 2.09E-10 | sensory perception of smell                                            | 1.18 | 1.24E-05 | 3.15E-02 |
| regulation of Rho protein signal transduction                   | 2.25 | 1.02E-07 | 1.38E-04 | G-protein coupled receptor signaling pathway                           | 1.15 | 8.98E-19 | 9.31E-15 |
| single organismal cell-cell adhesion                            | 1.98 | 2.05E-06 | 1.97E-03 |                                                                        |      |          |          |
| cytoskeleton organization                                       | 1.76 | 1.48E-06 | 1.66E-03 |                                                                        |      |          |          |
| regulation of small GTPase mediated signal transduction         | 1.72 | 3.44E-05 | 2.86E-02 |                                                                        |      |          |          |
| positive regulation of GTPase activity                          | 1.56 | 4.00E-12 | 1.35E-08 |                                                                        |      |          |          |
| cell adhesion                                                   | 1.52 | 8.97E-09 | 1.51E-05 |                                                                        |      |          |          |

1081  
1082

Table S6: Significant GO MF enrichments and depletions.

| Enriched                                       |      |          |           | Depleted                            |      |          |           |
|------------------------------------------------|------|----------|-----------|-------------------------------------|------|----------|-----------|
| MF                                             | FE   | p-value  | Benjamini | MF                                  | FE   | p-value  | Benjamini |
| microfilament motor activity                   | 3.57 | 8.54E-07 | 1.58E-04  | odorant binding                     | 1.24 | 6.66E-06 | 8.48E-03  |
| structural constituent of nuclear pore         | 2.97 | 1.14E-04 | 1.53E-02  | olfactory receptor activity         | 1.20 | 7.19E-18 | 2.76E-14  |
| nuclear localization sequence binding          | 2.71 | 7.24E-05 | 1.13E-02  | G-protein coupled receptor activity | 1.15 | 8.55E-15 | 1.64E-11  |
| microtubule motor activity                     | 2.68 | 2.40E-12 | 2.44E-09  |                                     |      |          |           |
| motor activity                                 | 2.63 | 6.78E-10 | 3.46E-07  |                                     |      |          |           |
| spectrin binding                               | 2.57 | 4.74E-04 | 4.96E-02  |                                     |      |          |           |
| Rho guanyl-nucleotide exchange factor activity | 2.43 | 3.59E-09 | 1.05E-06  |                                     |      |          |           |
| calmodulin binding                             | 2.03 | 4.30E-12 | 2.92E-09  |                                     |      |          |           |
| ATPase activity                                | 1.85 | 1.25E-08 | 2.55E-06  |                                     |      |          |           |
| microtubule binding                            | 1.84 | 1.62E-09 | 5.52E-07  |                                     |      |          |           |
| structural constituent of cytoskeleton         | 1.74 | 1.32E-04 | 1.67E-02  |                                     |      |          |           |
| guanyl-nucleotide exchange factor activity     | 1.74 | 8.04E-05 | 1.16E-02  |                                     |      |          |           |
| actin binding                                  | 1.68 | 8.75E-09 | 2.23E-06  |                                     |      |          |           |
| GTPase activator activity                      | 1.68 | 1.09E-08 | 2.47E-06  |                                     |      |          |           |
| protein kinase binding                         | 1.36 | 2.03E-04 | 2.41E-02  |                                     |      |          |           |
| chromatin binding                              | 1.35 | 3.00E-04 | 3.35E-02  |                                     |      |          |           |
| ATP binding                                    | 1.34 | 1.15E-12 | 2.34E-09  |                                     |      |          |           |
| calcium ion binding                            | 1.32 | 4.90E-06 | 8.32E-04  |                                     |      |          |           |
| protein binding                                | 1.08 | 1.08E-09 | 4.42E-07  |                                     |      |          |           |

1083  
1084

Table S7: Significant Reactome pathway enrichments and depletions.

| Enriched                                                    |      |          |           | Depleted                                 |      |          |           |
|-------------------------------------------------------------|------|----------|-----------|------------------------------------------|------|----------|-----------|
| Pathway                                                     | FE   | p-value  | Benjamini | Pathway                                  | FE   | p-value  | Benjamini |
| Cation-coupled Chloride cotransporters                      | 4.68 | 5.39E-04 | 2.80E-02  | Peptide chain elongation                 | 1.20 | 1.05E-04 | 3.80E-02  |
| Anchoring fibril formation                                  | 4.06 | 2.07E-06 | 7.64E-04  | Viral mRNA Translation                   | 1.20 | 1.05E-04 | 3.80E-02  |
| Extracellular matrix organization                           | 3.43 | 2.00E-04 | 1.29E-02  | Formation of a pool of free 40S subunits | 1.20 | 4.62E-05 | 2.24E-02  |
| Non-integrin membrane-ECM interactions                      | 3.04 | 2.05E-08 | 2.27E-05  | G alpha (i) signalling events            | 1.19 | 3.90E-10 | 2.88E-07  |
| Laminin interactions                                        | 2.81 | 2.51E-05 | 3.08E-03  | Olfactory Signaling Pathway              | 1.19 | 1.05E-16 | 1.64E-13  |
| Pre-NOTCH Transcription and Translation                     | 2.74 | 6.79E-05 | 7.49E-03  |                                          |      |          |           |
| NS1 Mediated Effects on Host Pathways                       | 2.66 | 1.27E-05 | 3.50E-03  |                                          |      |          |           |
| Regulation of Glucokinase by Glucokinase Regulatory Protein | 2.57 | 1.94E-04 | 1.42E-02  |                                          |      |          |           |
| Nuclear import of Rev protein                               | 2.55 | 1.26E-04 | 1.07E-02  |                                          |      |          |           |

|                                                              |      |          |          |  |  |  |
|--------------------------------------------------------------|------|----------|----------|--|--|--|
| Rev-mediated nuclear export of HIV RNA                       | 2.48 | 2.03E-04 | 1.24E-02 |  |  |  |
| Vpr-mediated nuclear import of PICs                          | 2.41 | 4.86E-04 | 2.65E-02 |  |  |  |
| Nuclear Pore Complex (NPC) Disassembly                       | 2.41 | 3.16E-04 | 1.82E-02 |  |  |  |
| Assembly of collagen fibrils and other multimeric structures | 2.24 | 1.95E-04 | 1.34E-02 |  |  |  |
| Collagen biosynthesis and modifying enzymes                  | 2.17 | 1.43E-05 | 2.63E-03 |  |  |  |
| Loss of Nlp from mitotic centrosomes                         | 2.14 | 1.36E-05 | 3.00E-03 |  |  |  |
| SUMOylation of RNA binding proteins                          | 2.09 | 8.45E-04 | 3.98E-02 |  |  |  |
| Anchoring of the basal body to the plasma membrane           | 2.05 | 1.24E-06 | 6.85E-04 |  |  |  |
| Recruitment of mitotic centrosome proteins and complexes     | 2.04 | 2.32E-05 | 3.66E-03 |  |  |  |
| Regulation of PLK1 Activity at G2/M Transition               | 1.97 | 2.44E-05 | 3.37E-03 |  |  |  |
| SUMOylation of DNA damage response and repair proteins       | 1.95 | 1.26E-04 | 1.15E-02 |  |  |  |
| ECM proteoglycans                                            | 1.93 | 1.84E-04 | 1.44E-02 |  |  |  |
| Regulation of HSF1-mediated heat shock response              | 1.87 | 7.48E-04 | 3.69E-02 |  |  |  |
| Rho GTPase cycle                                             | 1.74 | 8.86E-05 | 8.87E-03 |  |  |  |

1085

1086

Table S8: Significant sequence feature enrichments and depletions.

| Enriched                                       |      |          |           | Depleted             |      |          |           |
|------------------------------------------------|------|----------|-----------|----------------------|------|----------|-----------|
| Seq Feature                                    | FE   | p-value  | Benjamini | Seq Feature          | FE   | p-value  | Benjamini |
| region of interest:AAA 4                       | 4.67 | 2.17E-08 | 1.07E-05  | disulfide bond       | 1.06 | 6.61E-11 | 1.42E-06  |
| repeat:Spectrin 5                              | 4.67 | 2.17E-08 | 1.07E-05  | transmembrane region | 1.03 | 3.45E-06 | 3.64E-02  |
| region of interest:AAA 3                       | 4.67 | 2.17E-08 | 1.07E-05  |                      |      |          |           |
| region of interest:Stem                        | 4.67 | 2.17E-08 | 1.07E-05  |                      |      |          |           |
| region of interest:Stalk                       | 4.67 | 2.17E-08 | 1.07E-05  |                      |      |          |           |
| region of interest:AAA 2                       | 4.67 | 2.17E-08 | 1.07E-05  |                      |      |          |           |
| region of interest:AAA 1                       | 4.67 | 2.17E-08 | 1.07E-05  |                      |      |          |           |
| region of interest:AAA 5                       | 4.67 | 2.17E-08 | 1.07E-05  |                      |      |          |           |
| repeat:Spectrin 7                              | 4.67 | 9.45E-08 | 3.41E-05  |                      |      |          |           |
| region of interest:AAA 6                       | 4.67 | 9.45E-08 | 3.41E-05  |                      |      |          |           |
| repeat:Spectrin 8                              | 4.67 | 9.45E-08 | 3.41E-05  |                      |      |          |           |
| repeat:Spectrin 6                              | 4.67 | 9.45E-08 | 3.41E-05  |                      |      |          |           |
| repeat:Spectrin 9                              | 4.67 | 9.45E-08 | 3.41E-05  |                      |      |          |           |
| repeat:Spectrin 17                             | 4.67 | 4.09E-07 | 1.32E-04  |                      |      |          |           |
| repeat:Spectrin 13                             | 4.67 | 4.09E-07 | 1.32E-04  |                      |      |          |           |
| repeat:Spectrin 16                             | 4.67 | 4.09E-07 | 1.32E-04  |                      |      |          |           |
| repeat:Spectrin 15                             | 4.67 | 4.09E-07 | 1.32E-04  |                      |      |          |           |
| repeat:Spectrin 11                             | 4.67 | 4.09E-07 | 1.32E-04  |                      |      |          |           |
| repeat:Spectrin 10                             | 4.67 | 4.09E-07 | 1.32E-04  |                      |      |          |           |
| repeat:Spectrin 14                             | 4.67 | 4.09E-07 | 1.32E-04  |                      |      |          |           |
| repeat:Spectrin 12                             | 4.67 | 4.09E-07 | 1.32E-04  |                      |      |          |           |
| region of interest:5 X 4 AA repeats of P-X-X-P | 4.67 | 3.18E-05 | 4.80E-03  |                      |      |          |           |
| domain:Chromo 2                                | 4.67 | 3.18E-05 | 4.80E-03  |                      |      |          |           |
| repeat:Spectrin 18                             | 4.67 | 3.18E-05 | 4.80E-03  |                      |      |          |           |
| repeat:Spectrin 20                             | 4.67 | 1.33E-04 | 1.39E-02  |                      |      |          |           |
| domain:BEACH                                   | 4.67 | 1.33E-04 | 1.39E-02  |                      |      |          |           |
| repeat:Spectrin 19                             | 4.67 | 1.33E-04 | 1.39E-02  |                      |      |          |           |
| repeat:Spectrin 21                             | 4.67 | 5.46E-04 | 4.36E-02  |                      |      |          |           |
| domain:Laminin EGF-like 10                     | 4.25 | 3.34E-05 | 4.96E-03  |                      |      |          |           |
| domain:Laminin EGF-like 8                      | 4.25 | 3.34E-05 | 4.96E-03  |                      |      |          |           |
| domain:Laminin EGF-like 9                      | 4.21 | 1.29E-04 | 1.36E-02  |                      |      |          |           |
| domain:Laminin G-like 5                        | 4.16 | 4.86E-04 | 4.03E-02  |                      |      |          |           |
| domain:Laminin EGF-like 11                     | 4.16 | 4.86E-04 | 4.03E-02  |                      |      |          |           |
| repeat:PXXP 4                                  | 4.05 | 2.13E-06 | 5.14E-04  |                      |      |          |           |
| repeat:PXXP 3                                  | 4.05 | 2.13E-06 | 5.14E-04  |                      |      |          |           |
| repeat:PXXP 2                                  | 4.05 | 2.13E-06 | 5.14E-04  |                      |      |          |           |
| repeat:PXXP 5                                  | 4.05 | 2.13E-06 | 5.14E-04  |                      |      |          |           |
| repeat:PXXP 1                                  | 4.05 | 2.13E-06 | 5.14E-04  |                      |      |          |           |

|                                           |      |          |          |  |  |  |  |
|-------------------------------------------|------|----------|----------|--|--|--|--|
| repeat:Spectrin 4                         | 4.01 | 9.75E-09 | 5.08E-06 |  |  |  |  |
| domain:Cadherin 9                         | 3.96 | 2.98E-05 | 4.65E-03 |  |  |  |  |
| domain:Cadherin 8                         | 3.96 | 2.98E-05 | 4.65E-03 |  |  |  |  |
| domain:Laminin EGF-like 6                 | 3.96 | 2.98E-05 | 4.65E-03 |  |  |  |  |
| repeat:ANK 16                             | 3.96 | 2.98E-05 | 4.65E-03 |  |  |  |  |
| repeat:ANK 18                             | 3.90 | 1.08E-04 | 1.19E-02 |  |  |  |  |
| domain:Laminin EGF-like 7                 | 3.90 | 1.08E-04 | 1.19E-02 |  |  |  |  |
| repeat:ANK 19                             | 3.90 | 1.08E-04 | 1.19E-02 |  |  |  |  |
| repeat:ANK 17                             | 3.90 | 1.08E-04 | 1.19E-02 |  |  |  |  |
| repeat:Spectrin 3                         | 3.82 | 3.43E-08 | 1.53E-05 |  |  |  |  |
| repeat:ANK 20                             | 3.82 | 3.83E-04 | 3.27E-02 |  |  |  |  |
| repeat:ANK 21                             | 3.82 | 3.83E-04 | 3.27E-02 |  |  |  |  |
| domain:IPT/TIG 1                          | 3.82 | 3.83E-04 | 3.27E-02 |  |  |  |  |
| repeat:Spectrin 1                         | 3.78 | 2.29E-09 | 1.34E-06 |  |  |  |  |
| repeat:Spectrin 2                         | 3.78 | 2.29E-09 | 1.34E-06 |  |  |  |  |
| domain:Cadherin 7                         | 3.69 | 1.58E-06 | 3.91E-04 |  |  |  |  |
| domain:IPT/TIG 2                          | 3.60 | 2.84E-04 | 2.56E-02 |  |  |  |  |
| domain:Laminin EGF-like 4                 | 3.60 | 2.84E-04 | 2.56E-02 |  |  |  |  |
| domain:IPT/TIG 3                          | 3.60 | 2.84E-04 | 2.56E-02 |  |  |  |  |
| domain:Actin-binding                      | 3.51 | 4.23E-06 | 8.83E-04 |  |  |  |  |
| domain:Laminin N-terminal                 | 3.51 | 6.26E-05 | 7.70E-03 |  |  |  |  |
| repeat:ANK 14                             | 3.43 | 2.04E-04 | 1.93E-02 |  |  |  |  |
| repeat:ANK 13                             | 3.43 | 2.04E-04 | 1.93E-02 |  |  |  |  |
| repeat:ANK 15                             | 3.43 | 2.04E-04 | 1.93E-02 |  |  |  |  |
| domain:Laminin G-like 4                   | 3.43 | 2.04E-04 | 1.93E-02 |  |  |  |  |
| region of interest:Actin-binding          | 3.38 | 5.06E-08 | 1.98E-05 |  |  |  |  |
| domain:Importin N-terminal                | 3.34 | 6.44E-04 | 4.92E-02 |  |  |  |  |
| domain:IQ 3                               | 3.19 | 2.25E-05 | 3.63E-03 |  |  |  |  |
| short sequence motif:LXXLL motif 2        | 3.12 | 6.78E-05 | 8.12E-03 |  |  |  |  |
| short sequence motif:LXXLL motif 1        | 3.12 | 6.78E-05 | 8.12E-03 |  |  |  |  |
| region of interest:Triple-helical region  | 3.05 | 4.61E-05 | 6.35E-03 |  |  |  |  |
| domain:Cadherin 6                         | 3.04 | 6.71E-17 | 1.30E-13 |  |  |  |  |
| domain:Laminin G-like 3                   | 3.04 | 1.99E-04 | 1.93E-02 |  |  |  |  |
| domain:IQ 1                               | 2.97 | 1.18E-06 | 3.07E-04 |  |  |  |  |
| domain:IQ 2                               | 2.97 | 1.18E-06 | 3.07E-04 |  |  |  |  |
| domain:Laminin G-like 2                   | 2.96 | 4.98E-06 | 1.02E-03 |  |  |  |  |
| domain:Laminin G-like 1                   | 2.96 | 4.98E-06 | 1.02E-03 |  |  |  |  |
| domain:Arf-GAP                            | 2.96 | 4.98E-06 | 1.02E-03 |  |  |  |  |
| domain:Myosin head-like                   | 2.91 | 5.47E-07 | 1.66E-04 |  |  |  |  |
| repeat:Solcar 3                           | 2.84 | 6.81E-09 | 3.76E-06 |  |  |  |  |
| zinc finger region:PHD-type 2             | 2.80 | 2.62E-05 | 4.15E-03 |  |  |  |  |
| domain:CH 2                               | 2.77 | 1.07E-04 | 1.19E-02 |  |  |  |  |
| domain:CH 1                               | 2.77 | 1.07E-04 | 1.19E-02 |  |  |  |  |
| short sequence motif:DEAH box             | 2.72 | 8.44E-07 | 2.40E-04 |  |  |  |  |
| domain:Cadherin 4                         | 2.71 | 1.29E-16 | 1.16E-13 |  |  |  |  |
| domain:Cadherin 3                         | 2.71 | 1.29E-16 | 1.16E-13 |  |  |  |  |
| zinc finger region:PHD-type 1             | 2.69 | 3.06E-05 | 4.69E-03 |  |  |  |  |
| repeat:Solcar 1                           | 2.68 | 4.20E-08 | 1.71E-05 |  |  |  |  |
| repeat:Solcar 2                           | 2.68 | 4.20E-08 | 1.71E-05 |  |  |  |  |
| domain:ABC transporter 2                  | 2.67 | 2.02E-05 | 3.44E-03 |  |  |  |  |
| domain:ABC transporter 1                  | 2.67 | 2.02E-05 | 3.44E-03 |  |  |  |  |
| domain:HECT                               | 2.67 | 1.85E-04 | 1.83E-02 |  |  |  |  |
| domain:Cadherin 1                         | 2.64 | 9.71E-16 | 8.53E-13 |  |  |  |  |
| domain:Cadherin 2                         | 2.64 | 9.71E-16 | 8.53E-13 |  |  |  |  |
| domain:Cadherin 5                         | 2.63 | 3.25E-14 | 2.54E-11 |  |  |  |  |
| domain:Laminin EGF-like 2                 | 2.60 | 4.72E-04 | 3.95E-02 |  |  |  |  |
| domain:PH 1                               | 2.58 | 2.24E-05 | 3.69E-03 |  |  |  |  |
| domain:Bromo                              | 2.58 | 3.07E-04 | 2.71E-02 |  |  |  |  |
| domain:SH3 2                              | 2.57 | 1.48E-05 | 2.61E-03 |  |  |  |  |
| compositionally biased region:Gln-rich    | 2.55 | 9.21E-19 | 1.44E-15 |  |  |  |  |
| domain:Kinesin-motor                      | 2.55 | 6.40E-06 | 1.25E-03 |  |  |  |  |
| domain:FHA                                | 2.54 | 8.57E-05 | 1.00E-02 |  |  |  |  |
| domain:PH 2                               | 2.53 | 5.62E-05 | 7.20E-03 |  |  |  |  |
| domain:SH3 1                              | 2.52 | 3.68E-05 | 5.30E-03 |  |  |  |  |
| nucleotide phosphate-binding region:ATP 2 | 2.46 | 8.99E-05 | 1.02E-02 |  |  |  |  |

|                                           |      |          |          |  |  |  |
|-------------------------------------------|------|----------|----------|--|--|--|
| nucleotide phosphate-binding region:ATP 1 | 2.46 | 8.99E-05 | 1.02E-02 |  |  |  |
| domain:DH                                 | 2.41 | 1.71E-07 | 5.94E-05 |  |  |  |
| repeat:ANK 9                              | 2.39 | 9.20E-05 | 1.03E-02 |  |  |  |
| domain:CH                                 | 2.34 | 1.40E-04 | 1.44E-02 |  |  |  |
| domain:GPS                                | 2.34 | 4.98E-04 | 4.05E-02 |  |  |  |
| domain:IQ                                 | 2.30 | 4.99E-06 | 9.96E-04 |  |  |  |
| repeat:ANK 8                              | 2.24 | 2.04E-04 | 1.95E-02 |  |  |  |
| domain:Fibronectin type-III 4             | 2.23 | 1.10E-05 | 1.99E-03 |  |  |  |
| domain:Rho-GAP                            | 2.20 | 7.10E-06 | 1.36E-03 |  |  |  |
| repeat:HEAT 1                             | 2.18 | 5.46E-05 | 7.09E-03 |  |  |  |
| repeat:HEAT 2                             | 2.18 | 5.46E-05 | 7.09E-03 |  |  |  |
| domain:Fibronectin type-III 3             | 2.17 | 8.68E-07 | 2.40E-04 |  |  |  |
| compositionally biased region:Poly-Lys    | 2.16 | 7.38E-16 | 7.29E-13 |  |  |  |
| domain:Fibronectin type-III 5             | 2.13 | 6.29E-04 | 4.92E-02 |  |  |  |
| compositionally biased region:Poly-Ser    | 2.12 | 3.65E-34 | 1.14E-30 |  |  |  |
| compositionally biased region:Thr-rich    | 2.11 | 3.92E-04 | 3.32E-02 |  |  |  |
| domain:FERM                               | 2.10 | 5.87E-04 | 4.64E-02 |  |  |  |
| compositionally biased region:Ser-rich    | 2.09 | 3.83E-28 | 8.98E-25 |  |  |  |
| region of interest:Tail                   | 2.01 | 3.44E-05 | 5.03E-03 |  |  |  |
| repeat:ANK 7                              | 2.00 | 2.85E-04 | 2.54E-02 |  |  |  |
| repeat:LRR 11                             | 1.99 | 3.60E-06 | 7.85E-04 |  |  |  |
| domain:PDZ                                | 1.94 | 2.56E-06 | 5.72E-04 |  |  |  |
| region of interest:Head                   | 1.94 | 1.34E-04 | 1.39E-02 |  |  |  |
| compositionally biased region:His-rich    | 1.94 | 3.16E-04 | 2.76E-02 |  |  |  |
| repeat:LRR 10                             | 1.93 | 2.34E-06 | 5.36E-04 |  |  |  |
| domain:Fibronectin type-III 2             | 1.93 | 3.96E-07 | 1.33E-04 |  |  |  |
| repeat:LRR 13                             | 1.93 | 1.96E-04 | 1.92E-02 |  |  |  |
| domain:Fibronectin type-III 1             | 1.92 | 5.27E-07 | 1.65E-04 |  |  |  |
| domain:PH                                 | 1.91 | 1.00E-11 | 6.71E-09 |  |  |  |
| compositionally biased region:Poly-Leu    | 1.90 | 6.97E-07 | 2.04E-04 |  |  |  |
| region of interest:Rod                    | 1.87 | 4.88E-04 | 4.01E-02 |  |  |  |
| domain:Ig-like C2-type 4                  | 1.85 | 6.30E-04 | 4.89E-02 |  |  |  |
| repeat:ANK 6                              | 1.84 | 8.53E-05 | 1.01E-02 |  |  |  |
| domain:EGF-like 2                         | 1.84 | 2.19E-04 | 2.03E-02 |  |  |  |
| domain:Helicase C-terminal                | 1.82 | 6.14E-05 | 7.66E-03 |  |  |  |
| short sequence motif:Cell attachment site | 1.80 | 3.56E-04 | 3.08E-02 |  |  |  |
| compositionally biased region:Poly-Asp    | 1.79 | 5.06E-04 | 4.08E-02 |  |  |  |
| repeat:LRR 9                              | 1.78 | 1.76E-05 | 3.06E-03 |  |  |  |
| repeat:LRR 12                             | 1.77 | 6.37E-04 | 4.90E-02 |  |  |  |
| domain:Helicase ATP-binding               | 1.76 | 1.12E-04 | 1.21E-02 |  |  |  |
| domain:Ig-like C2-type 3                  | 1.75 | 4.96E-05 | 6.63E-03 |  |  |  |
| domain:EGF-like 1                         | 1.75 | 8.83E-05 | 1.02E-02 |  |  |  |
| repeat:ANK 5                              | 1.74 | 2.21E-05 | 3.70E-03 |  |  |  |
| compositionally biased region:Poly-Glu    | 1.74 | 2.09E-17 | 2.81E-14 |  |  |  |
| repeat:ANK 1                              | 1.72 | 4.13E-08 | 1.76E-05 |  |  |  |
| repeat:ANK 2                              | 1.72 | 5.14E-08 | 1.93E-05 |  |  |  |
| repeat:LRR 8                              | 1.71 | 3.77E-05 | 5.35E-03 |  |  |  |
| repeat:ANK 4                              | 1.70 | 9.53E-06 | 1.75E-03 |  |  |  |
| repeat:LRR 6                              | 1.70 | 9.62E-07 | 2.58E-04 |  |  |  |
| repeat:LRR 7                              | 1.70 | 7.51E-06 | 1.41E-03 |  |  |  |
| repeat:ANK 3                              | 1.69 | 1.34E-06 | 3.39E-04 |  |  |  |
| compositionally biased region:Glu-rich    | 1.66 | 2.78E-08 | 1.30E-05 |  |  |  |
| repeat:TPR 3                              | 1.65 | 1.17E-04 | 1.26E-02 |  |  |  |
| repeat:LRR 5                              | 1.64 | 2.15E-06 | 5.05E-04 |  |  |  |
| domain:SH3                                | 1.63 | 5.30E-05 | 6.99E-03 |  |  |  |
| compositionally biased region:Poly-Gln    | 1.62 | 1.83E-04 | 1.83E-02 |  |  |  |
| compositionally biased region:Pro-rich    | 1.62 | 1.41E-22 | 2.64E-19 |  |  |  |
| compositionally biased region:Poly-Arg    | 1.59 | 5.91E-05 | 7.47E-03 |  |  |  |

|                                         |      |          |          |  |  |  |
|-----------------------------------------|------|----------|----------|--|--|--|
| compositionally biased region:Poly-Pro  | 1.59 | 2.28E-09 | 1.42E-06 |  |  |  |
| domain:ig-like C2-type 1                | 1.53 | 2.23E-04 | 2.05E-02 |  |  |  |
| domain:ig-like C2-type 2                | 1.52 | 2.60E-04 | 2.37E-02 |  |  |  |
| repeat:LRR 4                            | 1.50 | 6.72E-05 | 8.16E-03 |  |  |  |
| compositionally biased region:Poly-Ala  | 1.46 | 3.77E-06 | 8.04E-04 |  |  |  |
| nucleotide phosphate-binding region:ATP | 1.46 | 1.51E-13 | 1.09E-10 |  |  |  |
| repeat:LRR 1                            | 1.46 | 4.23E-05 | 5.90E-03 |  |  |  |
| repeat:LRR 2                            | 1.45 | 4.84E-05 | 6.56E-03 |  |  |  |
| compositionally biased region:Poly-Gly  | 1.44 | 1.58E-04 | 1.60E-02 |  |  |  |
| repeat:LRR 3                            | 1.42 | 2.09E-04 | 1.96E-02 |  |  |  |
| splice variant                          | 1.30 | 1.82E-68 | 1.71E-64 |  |  |  |
| sequence variant                        | 1.18 | 2.22E-68 | 1.04E-64 |  |  |  |

1087

1088

Table S9: Significant keyword enrichments and depletions.

| Enriched                            |      |          |           | Depleted                   |      |          |           |
|-------------------------------------|------|----------|-----------|----------------------------|------|----------|-----------|
| Keyword                             | FE   | p-value  | Benjamini | Keyword                    | FE   | p-value  | Benjamini |
| Ribosomal frameshifting             | 3.61 | 5.90E-06 | 1.19E-04  | Redox-active center        | 1.26 | 5.44E-04 | 2.96E-02  |
| Thick filament                      | 3.55 | 2.00E-05 | 3.39E-04  | Antibiotic                 | 1.20 | 6.55E-04 | 3.30E-02  |
| Dynein                              | 3.10 | 2.15E-07 | 4.98E-06  | Olfaction                  | 1.19 | 3.87E-17 | 9.25E-15  |
| Aspartyl protease                   | 3.10 | 7.24E-05 | 1.08E-03  | Ribosomal protein          | 1.19 | 1.68E-07 | 1.72E-05  |
| Viral envelope protein              | 2.93 | 6.00E-04 | 6.46E-03  | G-protein coupled receptor | 1.14 | 1.37E-17 | 4.92E-15  |
| Laminin EGF-like domain             | 2.70 | 5.03E-05 | 8.07E-04  | Transducer                 | 1.14 | 2.56E-18 | 1.84E-15  |
| Bromodomain                         | 2.62 | 9.69E-06 | 1.89E-04  | Sensory transduction       | 1.13 | 5.84E-11 | 1.05E-08  |
| Autism                              | 2.60 | 7.71E-04 | 7.88E-03  | Palmitate                  | 1.12 | 2.64E-05 | 1.72E-03  |
| Motor protein                       | 2.58 | 1.93E-17 | 1.72E-15  | Ribonucleoprotein          | 1.10 | 5.39E-04 | 3.17E-02  |
| Transposable element                | 2.56 | 3.29E-04 | 3.81E-03  | Lipoprotein                | 1.10 | 3.30E-09 | 4.73E-07  |
| Basement membrane                   | 2.56 | 1.63E-05 | 2.83E-04  | Receptor                   | 1.06 | 2.31E-06 | 1.65E-04  |
| ERV                                 | 2.49 | 8.08E-04 | 8.13E-03  | Mitochondrion              | 1.05 | 7.81E-04 | 3.67E-02  |
| Myosin                              | 2.46 | 3.35E-06 | 6.99E-05  | Disulfide bond             | 1.04 | 2.70E-07 | 2.15E-05  |
| Calmodulin-binding                  | 2.26 | 3.48E-13 | 1.67E-11  | Transmembrane              | 1.03 | 9.41E-08 | 1.12E-05  |
| Triplet repeat expansion            | 2.17 | 6.00E-03 | 4.77E-02  | Transmembrane helix        | 1.03 | 1.93E-07 | 1.73E-05  |
| Autism spectrum disorder            | 2.09 | 2.28E-03 | 1.89E-02  |                            |      |          |           |
| Guanine-nucleotide releasing factor | 2.09 | 3.82E-10 | 1.50E-08  |                            |      |          |           |
| Nuclear pore complex                | 2.04 | 8.79E-04 | 8.70E-03  |                            |      |          |           |
| Autocatalytic cleavage              | 2.04 | 3.70E-04 | 4.21E-03  |                            |      |          |           |
| Microtubule                         | 2.01 | 6.19E-16 | 4.63E-14  |                            |      |          |           |
| Intermediate filament               | 1.93 | 1.51E-04 | 2.09E-03  |                            |      |          |           |
| Actin-binding                       | 1.90 | 7.05E-13 | 3.15E-11  |                            |      |          |           |
| GTPase activation                   | 1.86 | 6.04E-09 | 1.99E-07  |                            |      |          |           |
| Hydroxylation                       | 1.81 | 1.98E-04 | 2.58E-03  |                            |      |          |           |
| Collagen                            | 1.80 | 1.78E-04 | 2.42E-03  |                            |      |          |           |
| SH3 domain                          | 1.79 | 1.88E-08 | 5.35E-07  |                            |      |          |           |
| Cell adhesion                       | 1.78 | 4.28E-17 | 3.35E-15  |                            |      |          |           |
| Tight junction                      | 1.73 | 1.40E-03 | 1.27E-02  |                            |      |          |           |
| Helicase                            | 1.72 | 3.28E-05 | 5.40E-04  |                            |      |          |           |
| ANK repeat                          | 1.67 | 8.97E-08 | 2.25E-06  |                            |      |          |           |
| mRNA transport                      | 1.67 | 1.03E-03 | 9.84E-03  |                            |      |          |           |
| Coiled coil                         | 1.67 | 5.05E-87 | 1.58E-84  |                            |      |          |           |
| Calcium transport                   | 1.66 | 1.80E-03 | 1.56E-02  |                            |      |          |           |
| Cytoskeleton                        | 1.66 | 1.22E-29 | 1.53E-27  |                            |      |          |           |
| Nucleotidyltransferase              | 1.65 | 6.37E-03 | 4.88E-02  |                            |      |          |           |
| Chromosomal rearrangement           | 1.63 | 1.49E-08 | 4.44E-07  |                            |      |          |           |
| Chromatin regulator                 | 1.62 | 2.39E-07 | 5.33E-06  |                            |      |          |           |
| TPR repeat                          | 1.61 | 1.10E-04 | 1.56E-03  |                            |      |          |           |
| Extracellular matrix                | 1.60 | 1.85E-06 | 4.00E-05  |                            |      |          |           |
| Cell projection                     | 1.60 | 6.71E-16 | 4.17E-14  |                            |      |          |           |
| Ciliopathy                          | 1.59 | 1.40E-03 | 1.28E-02  |                            |      |          |           |
| Cilium biogenesis/degradation       | 1.57 | 7.04E-04 | 7.45E-03  |                            |      |          |           |
| Biological rhythms                  | 1.56 | 2.23E-03 | 1.87E-02  |                            |      |          |           |
| Cilium                              | 1.55 | 9.77E-05 | 1.42E-03  |                            |      |          |           |
| Endocytosis                         | 1.54 | 3.96E-03 | 3.22E-02  |                            |      |          |           |
| Mental retardation                  | 1.51 | 1.20E-05 | 2.28E-04  |                            |      |          |           |
| Cell junction                       | 1.47 | 7.52E-10 | 2.62E-08  |                            |      |          |           |



|                          |      |          |          |  |  |  |
|--------------------------|------|----------|----------|--|--|--|
| EGF-like domain          | 1.44 | 5.73E-04 | 6.39E-03 |  |  |  |
| Proto-oncogene           | 1.44 | 7.35E-04 | 7.64E-03 |  |  |  |
| Calcium                  | 1.40 | 7.26E-10 | 2.67E-08 |  |  |  |
| ATP-binding              | 1.40 | 7.04E-15 | 3.65E-13 |  |  |  |
| DNA repair               | 1.40 | 5.87E-04 | 6.43E-03 |  |  |  |
| DNA damage               | 1.39 | 2.25E-04 | 2.75E-03 |  |  |  |
| Deafness                 | 1.38 | 6.01E-03 | 4.73E-02 |  |  |  |
| Mitosis                  | 1.38 | 1.60E-03 | 1.42E-02 |  |  |  |
| Activator                | 1.33 | 1.20E-05 | 2.21E-04 |  |  |  |
| Phosphoprotein           | 1.33 | 1.13E-88 | 7.06E-86 |  |  |  |
| Isopeptide bond          | 1.33 | 9.52E-09 | 2.98E-07 |  |  |  |
| Ubl conjugation          | 1.32 | 2.48E-12 | 1.04E-10 |  |  |  |
| Repressor                | 1.32 | 5.82E-05 | 9.11E-04 |  |  |  |
| Methylation              | 1.32 | 1.42E-07 | 3.43E-06 |  |  |  |
| Protein transport        | 1.31 | 6.82E-05 | 1.04E-03 |  |  |  |
| Cell division            | 1.31 | 1.77E-03 | 1.55E-02 |  |  |  |
| Disease mutation         | 1.29 | 2.84E-15 | 1.64E-13 |  |  |  |
| Cell cycle               | 1.28 | 1.87E-04 | 2.49E-03 |  |  |  |
| Immunoglobulin domain    | 1.26 | 1.38E-03 | 1.28E-02 |  |  |  |
| Nucleotide-binding       | 1.24 | 4.55E-08 | 1.19E-06 |  |  |  |
| Cytoplasm                | 1.24 | 4.82E-23 | 5.03E-21 |  |  |  |
| Differentiation          | 1.23 | 1.83E-03 | 1.56E-02 |  |  |  |
| Alternative splicing     | 1.22 | 7.27E-68 | 1.14E-65 |  |  |  |
| Polymorphism             | 1.20 | 1.83E-76 | 3.83E-74 |  |  |  |
| Developmental protein    | 1.20 | 9.18E-04 | 8.95E-03 |  |  |  |
| Zinc-finger              | 1.19 | 1.58E-05 | 2.82E-04 |  |  |  |
| Transport                | 1.15 | 2.25E-04 | 2.81E-03 |  |  |  |
| Transcription regulation | 1.13 | 2.64E-04 | 3.18E-03 |  |  |  |
| Transcription            | 1.13 | 2.22E-04 | 2.83E-03 |  |  |  |
| Nucleus                  | 1.12 | 4.01E-08 | 1.09E-06 |  |  |  |
| Zinc                     | 1.12 | 1.07E-03 | 1.01E-02 |  |  |  |
| Metal-binding            | 1.10 | 3.11E-04 | 3.67E-03 |  |  |  |
| Acetylation              | 1.08 | 6.24E-03 | 4.84E-02 |  |  |  |

1089
